1 **Title**

2 **Cytoplasmic innate immune sensing by the caspase-4 non-canonical**  
3 **inflammasome promotes cellular senescence.**

4  
5 **Authors**

6 Irene Fernández-Duran<sup>1</sup>, Núria Tarrats<sup>1</sup>, Jodie Birch<sup>2</sup>, Priya Hari<sup>1</sup>, Fraser R. Millar<sup>1</sup>, Morwenna Muir<sup>1</sup>,  
7 Andrea Quintanilla<sup>1</sup>, Valerie G. Brunton<sup>1</sup>, João F. Passos<sup>2,3</sup>, Juan Carlos Acosta<sup>1\*</sup>

8  
9 **Affiliations**

10 <sup>1</sup>Cancer Research UK Edinburgh Centre, Institute of Genetics and Molecular Medicine, University of  
11 Edinburgh, Edinburgh EH4 2XR, UK

12 <sup>2</sup>Institute for Cell and Molecular Biosciences, Campus for Ageing and Vitality, Newcastle University  
13 Institute for Ageing, Newcastle University, Newcastle Upon Tyne, NE4 5PL, UK

14 <sup>3</sup>Department of Physiology and Biomedical Engineering, Robert and Arlene Kogod Center on  
15 Aging, 200 First Street SW, Rochester, MN 55905, USA

16 \*Correspondence to: [juan-carlos.acosta@igmm.ed.ac.uk](mailto:juan-carlos.acosta@igmm.ed.ac.uk)

17  
18 **Running title: control of cellular senescence by caspase-4**

19  
20 **Key words**

21 Cellular senescence, SASP, caspase-4, non-canonical inflammasomes, gasdermin-D, oncogene-  
22 induced senescence, LPS, innate immune signaling.

23  
24 **Summary**

25 Cytoplasmic recognition of microbially derived lipopolysaccharides (LPS) in human cells is elicited by  
26 the inflammatory cysteine aspartic proteases caspase-4 and caspase-5, which activate non-canonical  
27 inflammasomes inducing a form of inflammatory programmed cell death termed pyroptosis. Here we  
28 show that LPS mediated activation of the non-canonical inflammasome also induces cellular  
29 senescence and the activation of tumour suppressor stress responses in human diploid fibroblasts.

30 Interestingly, this LPS-induced senescence is dependent on caspase-4, the pyroptotic effector protein  
31 gasdermin-D and the tumour suppressor protein p53. Also, experiments with a catalytically deficient  
32 mutant suggest that caspase-4 proteolytic activity is not necessary for its role in senescence.  
33 Furthermore, we found that the caspase-4 non-canonical inflammasome is induced and assembled  
34 during Ras-mediated oncogene-induced senescence (OIS). Moreover, targeting caspase-4 in OIS  
35 showed that the non-canonical inflammasome is critical for SASP activation and contributes to  
36 reinforcing the cell cycle arrest in OIS. Finally, we observed that caspase-4 induction occurs *in vivo* in  
37 models of tumour suppression and ageing. Altogether, we are unveiling that cellular senescence is  
38 induced by cytoplasmic microbial LPS recognition by the caspase-4 non-canonical inflammasome and  
39 that this pathway is conserved in the senescence program induced by oncogenic stress.

40

## 41 **Introduction**

42 Cellular senescence is a cell state characterized by a proliferative cellular arrest, a secretory phenotype,  
43 macromolecular damage and altered metabolism that can be triggered by several different stress  
44 mechanisms (Gorgoulis et al., 2019). Senescent cells produce and secrete a myriad of soluble and  
45 insoluble factors, including cytokines, chemokines, proteases and growth factors, collectively known as  
46 the senescence-associated secretory phenotype (SASP) (Acosta et al., 2008; Coppe et al., 2008;  
47 Kuilman et al., 2008) and interleukin-1 (IL-1) signalling is one of its critical signalling pathways (Acosta  
48 et al., 2013; Orjalo et al., 2009). The role of the SASP in cancer is complex and mechanistically ill-  
49 defined in ageing-associated diseases, two of the critical pathophysiological contexts where  
50 senescence is functionally relevant (Faget et al., 2019; McHugh and Gil, 2018) . More recent evidence  
51 proposes that different triggers might induce distinctive SASP subsets with concrete functions (Herranz  
52 and Gil, 2018). Nonetheless, the SASP has started to incite interest as a potential therapeutic target in  
53 disease (Paez-Ribes et al., 2019; Soto-Gamez and Demaria, 2017) . Therefore, a better understanding  
54 of the molecular machinery regulating the SASP is needed.

55 Pattern recognition receptors (PRRs) of the innate immune system are molecular sensors that are  
56 activated by microbial-derived pathogen-associated molecular patterns (PAMPs) or by damage-  
57 associated molecular patterns (DAMPs or alarmins) generated endogenously in cells under certain  
58 conditions of stress and damage (Takeuchi and Akira, 2010). Emerging data indicate a close  
59 relationship between these PRRs and cellular senescence. For example, the SASP is initiated following

60 nucleic acid sensing by the cGAS-STING pathway and serum amyloid signalling through the PRR toll-  
61 like receptor-2 (TLR2) during oncogene-induced senescence is critical for the SASP and the cell cycle  
62 arrest (Dou et al., 2017; Gluck et al., 2017; Hari et al., 2019). Moreover, we have previously shown that  
63 inflammasomes are crucial for the SASP (Acosta et al., 2013). Inflammasomes are multiprotein  
64 platforms that induce the proteolytic activity of the inflammatory cysteine-aspartic protease caspase-1  
65 which activates by proteolytic cleavage the proinflammatory cytokines IL-1 $\beta$  and interleukin-18 (IL-18).  
66 The canonical inflammasomes are assembled by PRRs of the nod-like receptor family, pyrin or by the  
67 cytoplasmic DNA sensor AIM2 (Lamkanfi and Dixit, 2014; Man and Kanneganti, 2016). Alternatively,  
68 the related inflammatory caspase-4 and caspase-5 (caspase-11 in mice) function as independent PRRs  
69 for cytoplasmic microbial lipopolysaccharide (LPS) activating a non-canonical inflammasome. Critically,  
70 activated non-canonical inflammasomes cleave the effector protein gasdermin-D, which induce a form  
71 of inflammatory programmed cell death termed pyroptosis (Kayagaki et al., 2015; Shi et al., 2015; Shi  
72 et al., 2014). Because the mechanism of SASP regulation by inflammasomes remain ill-defined, we  
73 decided to define the role of these inflammatory caspases in senescence. We show here that caspase-  
74 4 activation by cytoplasmic LPS triggers a senescence phenotype. Nonetheless, caspase-4 induction  
75 and non-canonical inflammasome assembly were observed in RAS<sup>G12V</sup>-oncogene-induced senescence  
76 (OIS). Moreover, we show here that the caspase-4 non-canonical inflammasome contributes critically  
77 to the establishment of the SASP and the reinforcement of the cell cycle arrest program during OIS, in  
78 a mechanism that is independent on its catalytic activity over its downstream pyroptotic target  
79 gasdermin-D. In all, we describe a new and critical function for cytoplasmic sensing by the caspase-4  
80 non-canonical inflammasome in cellular senescence.

81

## 82 **Results**

### 83 ***Cytoplasmic LPS recognition by caspase-4 induces a senescent response in human diploid*** 84 ***fibroblasts.***

85 While the canonical inflammasome can be activated with the microbial-derived molecule muramyl-  
86 dipeptide (MDP), the caspase-4 non-canonical inflammasome detects cytoplasmic bacterial LPS  
87 inducing gasdermin-D cleavage and pyroptosis. Gasdermin-D is the best characterized functional  
88 substrate of non-canonical inflammasomes, eliciting IL-1 $\beta$  secretion and pyroptotic cell death (He et al.,  
89 2015; Kayagaki et al., 2015; Shi et al., 2015). To compare the effect of activating the canonical and

90 non-canonical inflammasome in senescence, we activated the caspase-1 or the caspase-4  
91 inflammasomes by transfection of MDP or LPS in human IMR90 fibroblasts respectively. Similarly to  
92 other human cells expressing caspase-4 (Shi et al., 2014), IMR90 cells were sensitive to intracellular  
93 LPS in a dose-dependent manner (Figure S1A-C). In contrast, MDP transfection did not induce cell  
94 death (Figure S1A). LPS addition without further electroporation did not result in cell death, confirming  
95 the requirement of an intracellular location for LPS to trigger pyroptosis (Figure S1C). Knockdown of  
96 the pyroptosis effectors caspase-4 and gasdermin-D, but not caspase-1 impaired cell death mediated  
97 by LPS transfection, confirming that the cells were dying by pyroptosis (Figure S1D-F). Noticeably, cell  
98 death was detectable within the first hours after LPS transfection (Figure S1G). However, the fraction  
99 of cells surviving cell death after these hours remained stable and viable (Figure S1H), and this  
100 subpopulation was further examined.

101 Interestingly, this subset of cells displayed features of senescent cells such as decreased cell  
102 proliferation, increased levels of the cyclin-dependent kinase inhibitors p16<sup>INK4a</sup> and p21<sup>CIP1</sup> and  
103 increased senescence-associated- $\beta$ -galactosidase (SA- $\beta$ -galactosidase) activity (Figure S1I-J). In  
104 contrast, MDP transfection did not induce a senescent response (Figure S1J), indicating a specific role  
105 for the non-canonical inflammasome in PAMP-induced cellular senescence. Furthermore, the  
106 acquisition of a senescent phenotype was also accompanied by increased levels of caspase-4 (Figure  
107 S1J).

108 To examine the contribution of inflammatory caspases to the acquisition of a senescent phenotype  
109 following LPS transfection, we downregulated the expression of *CASP1* or *CASP4* with shRNA before  
110 transfection (Figure 1A). In contrast to caspase-1, caspase-4 was required for the acquisition of  
111 senescent features such as increased SA- $\beta$ -galactosidase activity, decreased cell proliferation and  
112 induction of p21<sup>CIP1</sup> and p16<sup>INK4a</sup> in the subpopulation of cells surviving cell death (Figure 1B-D). Next,  
113 human *CASP1* and *CASP4* were ectopically expressed in IMR90 fibroblasts (Figure S2A).  
114 Overexpression of *CASP1* or *CASP4* alone resulted in a mild senescence induction with reduced cell  
115 proliferation and increased SA- $\beta$ -galactosidase activity (Figure S2B-C). However, *CASP4*  
116 overexpression exacerbated the acquisition of senescent features in the presence of intracellular LPS  
117 (Figure 1E-F, S2D), indicating that caspase-4 expression is critical for non-canonical inflammasome  
118 induced senescence. Overall, these results suggest that the acquisition of a senescent phenotype  
119 following intracellular LPS exposure is mediated through caspase-4 in a dose-dependent manner.

120 We decided to investigate the role of the caspase-4 substrate gasdermin-D and the critical senescence  
121 regulator p53 in LPS-induced senescence and pyroptosis by targeting their expression with shRNAs.  
122 In contrast to *GSDMD*, *TP53* knockdown failed to impair LPS mediated cell death, indicating a negligent  
123 role for p53 regulating caspase-4 dependent pyroptosis (Figure S1F). However, *TP53* and *GSDMD*  
124 knockdown significantly reduced LPS dependent cell growth arrest, and p53 and p21<sup>CIP1</sup> induction  
125 (Figure 1G-H, S2E). Interestingly, *GSDMD* knockdown also had a strong effect on p16<sup>INK4a</sup> and  
126 caspase-4 induction during LPS-induced senescence (Figure 1I, S2F). Altogether, these results  
127 indicate that cytoplasmic LPS sensing by the non-canonical inflammasome induced a senescence  
128 response that is dependent on caspase-4, gasdermin-D and p53 expression.

129

130 ***The caspase-4 mediated LPS-induced senescent response is independent of IL-1 $\beta$  priming.***

131 Because overproduction of activated IL-1 $\beta$  can have detrimental effects (Afonina et al., 2015), the  
132 inflammasome activation is tightly regulated by a two-step mechanism. In some cases, a first signal,  
133 also called priming, is required to boost transcriptional levels of *IL1B*. The priming signal is then followed  
134 by a second signal which induces the assembly of the inflammasome (Lamkanfi and Dixit, 2014).  
135 Intriguingly, senescence induction by the sole overexpression of *CASP4* or *CASP1* in IMR90 fibroblasts  
136 did not induce transcriptional activation of *IL1B* (Figure 2A). In contrast, *IL1B* transcriptional levels were  
137 increased upon LPS transfection in a caspase-4 dependent fashion (Figure 2B). We have previously  
138 shown that TLR2 has a role in controlling *IL1B* expression and the SASP in cellular senescence (Hari  
139 et al., 2019). Thus, we decided to investigate if TLR2 mediated inflammasome priming could synergize  
140 with LPS-mediated caspase-4 induced senescence. As expected, the addition of the synthetic  
141 lipopeptides Pam2CSK4 and Pam3CSK4 (TLR2/6 and TLR1/2 agonists, respectively) but not LPS  
142 (TLR4 agonist) nor MDP to IMR90 cells highly induced *IL1B* mRNA levels (Figure S2G). Then, we  
143 observed that priming the inflammasome with the TLR2 agonist Pam2CKS4 significantly synergizes  
144 with LPS transfection to produce a robust IL-1 $\beta$  induction, and this induction was further enhanced by  
145 *CASP4* ectopic overexpression (Figure 2C). However, we did not observe a dramatic increase in cell  
146 cycle arrest or SA- $\beta$ -galactosidase activity in LPS-induced senescence by addition of Pam2CKS4  
147 (Figure 2D-E). Similar results were observed when TLR2 overexpressing cells were primed with the  
148 endogenous senescence-associated TLR2 alarmin A-SAA (Hari et al., 2019) or Pam2CKS4 with LPS  
149 transfection, which synergized in producing robust *IL1B* and SASP induction but without affecting

150 dramatically LPS-induced cell cycle arrest or SA- $\beta$ -Galactosidase activity (Figure S2H-L). However, the  
151 observed increase in *IL1B* mRNA levels in LPS transfected cells in all conditions is minimal if compared  
152 to the logarithmic increase observed in OIS (Figure 2C). These results suggest that additional signals  
153 to caspase-4 stimulation such as a sustained priming signalling are necessary for a robust *IL1B* and  
154 SASP induction during LPS-mediated cellular senescence. Moreover, these data suggest that the LPS-  
155 induced caspase-4 senescent response is independent of *IL1B* and the SASP.

156

157 ***The caspase-4 proteolytic activity is not necessary for LPS-induced senescence.***

158 The active site of human caspase-4 has been well characterized and is associated to the residue C258  
159 (Faucheu et al., 1995), and point mutations of this amino acid renders the protein catalytically inactive  
160 (Shi et al., 2014; Sollberger et al., 2012). To further study the contribution of the protease activity of  
161 caspase-4 protease to senescence, *CASP4* wild-type and the catalytically death mutant C258A  
162 (*CASP4*<sup>C258A</sup>) were overexpressed in IMR90 cells, and the phenotypical outcomes were assessed.  
163 Overexpression of wild-type *CASP4* or *CASP4*<sup>C258A</sup> reduced cellular proliferation and increased SA- $\beta$ -  
164 galactosidase activity to a similar extent (Figure 3A-B). Next, *CASP4* wild-type and *CASP4*<sup>C258A</sup> were  
165 stably overexpressed in IMR90 fibroblasts before LPS transfection (Figure 3C). *CASP4*<sup>C258A</sup> but not  
166 *CASP4* wild-type expressing IMR90 cells were resistant to cell death after LPS transfection (Figure 3D,  
167 S3A), indicating a dominant negative role for the caspase-4 defective form in pyroptosis. However, both  
168 *CASP4* wild-type and *CASP4*<sup>C258A</sup> overexpressing cells remained equally sensitive to the acquisition of  
169 senescent features after LPS challenge (Figure 3E-F, S3B). These results suggest that, in contrast to  
170 caspase-4 mediated pyroptosis, the role of caspase-4 in LPS-induced senescence is independent of  
171 its catalytic activity.

172

173 ***The caspase-4 non-canonical inflammasome is induced and assembled during oncogene-***  
174 ***induced senescence.***

175 Next, the role of inflammatory caspases in oncogene-induced senescence (OIS) was investigated. To  
176 induce OIS, *HRAS*<sup>G12V</sup> (hereafter *RAS*<sup>G12V</sup>) was constitutively overexpressed in IMR90 human  
177 fibroblasts. *RAS*<sup>G12V</sup> overexpression reduced cellular proliferation and increased SA- $\beta$ -galactosidase  
178 activity (Figure 4A). Coinciding with the upregulation of the cell cycle inhibitors p21<sup>CIP1</sup>, p16<sup>INK4a</sup> and  
179 p15<sup>INK4b</sup>, caspase-4 expression was increased both at the mRNA and protein levels upon *RAS*<sup>G12V</sup>

180 overexpression (Figure S4A-B, 4B-C). Next, we took advantage of an inducible system extensively  
181 employed by us and others to exert tight control over the onset of senescence (Boumendil et al., 2019).  
182 In this system, a mutant form of the estrogen receptor (ER) ligand-binding domain is fused to the protein  
183 of interest (RAS); consequently, ER:RAS cells undergo OIS after addition of 4-hydroxytamoxifen  
184 (4OHT) (Figure 4D). As expected, IMR90 ER:RAS cells underwent cell proliferation arrest and showed  
185 increased SA- $\beta$ -galactosidase activity compared to non-treated IMR90 ER:RAS upon 4OHT addition  
186 (Figure 4D). A time-course experiment using this system revealed that *CASP4* mRNA levels increase  
187 in parallel to the exponential increase in *IL1B* mRNA expression in cells undergoing OIS (Figure 4E-F),  
188 and in caspase-4 protein (Figure 4G). Also, we observed caspase-4 induction in paracrine senescence,  
189 and senescence induced by DNA damage with etoposide (Figure S4C-D). Oligomerization of caspase-  
190 4 protein is essential for its activity (Shi et al., 2014). These caspase-4 oligomers can be revealed in  
191 lysates crosslinked with disuccinimidyl suberate (DSS) as high weight migratory bands in a western blot  
192 (Choi et al., 2019). Endogenous caspase-4 oligomerization was detected in IMR90 ER:RAS senescent  
193 cells but not in control cells from 3 days after 4OHT treatment (Figure 4H, S4E). Moreover, caspase-4  
194 proteolytic activity was also increased in IMR90 ER:RAS cells 4 and 8 days after the addition of 4OHT  
195 (Figure 4I). Altogether these results demonstrate that caspase-4 expression is induced and the non-  
196 canonical inflammasome is assembled in OIS.

197

198 ***The caspase-4 non-canonical inflammasome is required for inflammatory signalling in OIS.***

199 Next, a functional role for caspase-4 in OIS was investigated in our IMR90 ER:RAS system. Global  
200 changes in mRNA expression upon *CASP4* depletion were analyzed. IMR90 ER:STOP and ER:RAS  
201 cells were transfected with control and *CASP4*-targeting small-interfering RNA (siRNA), samples were  
202 collected 5 and 8 days after 4OHT addition and subjected to transcriptomic analysis (Figure 5A).  
203 Knockdown control of the experiment was performed by mRNA expression analysis for *CASP4*,  
204 showing a substantial reduction of its expression upon siRNA targeting at both time points (Figure S5A).  
205 Furthermore, *CASP4* was the top downregulated gene in *CASP4* siRNA-targeted compared to non-  
206 target siRNA control RAS<sup>G12V</sup> cells both 5 and 8 days after the addition of 4OHT (Figure S5B).  
207 Similarities between replicates and differences between conditions were confirmed by principal  
208 component analysis visualization and heatmap sample clustering (Figure S5C-D). Differentially  
209 expressed gene analysis identified 557 and 478 genes significantly differentially expressed (FDR 10%)

210 upon *CASP4* knockdown, of which 340 and 240 were induced in a *CASP4* dependent fashion in  
211 *RAS<sup>G12V</sup>*-OIS cells 5 and 8 days after 4OHT addition respectively (Figure 5A). Gene set enrichment  
212 analysis (GSEA) of 50 hallmark gene sets of the transcriptomic data showed a *CASP4* dependent  
213 regulation in *RAS<sup>G12V</sup>*-OIS cells of gene sets related to inflammatory processes, including TNF- $\alpha$   
214 signalling and interferon responses, both 5 and 8 days after the addition of 4OHT (Figure 5B).  
215 Enrichment plots of the gene signature hallmark “INFLAMMATORY RESPONSE” showed a positive  
216 correlation of this gene set expression with *CASP4* (Figure S5E). Plotting a heatmap of the fold change  
217 values of control IMR90 ER:STOP and *CASP4* knockdown vs control IMR90 ER:RAS cells of all genes  
218 included in the “INFLAMMATORY RESPONSE” gene set revealed a pattern by which the increased  
219 expression of inflammatory-related genes in senescence is abrogated if *CASP4* is targeted, including  
220 SASP factors (Figure 5C). Changes in the expression of *IL1A* and *IL1B* were validated by RT-qPCR  
221 (Figure 5D-E). The serum amyloid A (SAA) proteins SAA1 and SAA2 belong to a family of  
222 apolipoproteins known to activate innate and adaptive immune cells and have recently been identified  
223 as SASP factors (Hari et al., 2019). Of note, the expression of SAA1 and SAA2 was also decreased  
224 when *CASP4* was targeted in OIS (Figure 5F-G). Targeting *CASP4* also reduced the amount of  
225 intracellular IL-1 $\alpha$ , IL-1 $\beta$ , IL-6 and IL-8 protein to a similar extent than *CASP1* targeting (Figure S5F).  
226 Moreover, the levels of intracellular mature IL-1 $\beta$  were also significantly and similarly reduced when  
227 either *CASP1* or *CASP4* were targeted (Figure 5H). Furthermore, the concentration of secreted IL-1 $\beta$   
228 was significantly reduced in conditioned media of RAS induced cell cultures when *CASP4* was targeted  
229 (Figure 5I). Overall, these results suggest that caspase-4 upstream of caspase-1 are required for a full  
230 SASP activation in OIS.

231 The SASP can induce senescence in adjacent growing cells through paracrine signaling, which is  
232 dependent on IL-1 signaling (Acosta et al., 2013). Because *CASP1* and *CASP4*-targeting reduced the  
233 production of several SASP factors and, in particular, limited the secretion of IL-1 $\beta$ , we next examined  
234 whether inflammatory caspases are implicated in SASP induction during paracrine senescence (Figure  
235 S5G). Conditioned media from IMR90-ER:RAS senescent cells added to growing IMR90 fibroblasts  
236 produced the induction of *IL1A*, *IL1B*, *IL8* and *IL6*, which was impaired when *CASP4* was targeted  
237 (Figure S5G). In contrast, *CASP1* targeting did not affect the induction of the paracrine SASP (Figure  
238 S5G). Overall, these data suggest that the caspase-4 non-canonical inflammasome controls SASP  
239 activation during paracrine senescence.



240 We then investigated the role of gasdermin-D in OIS. While mRNA levels remained unaffected (Figure  
241 S6A), gasdermin-D was found to be cleaved during OIS (Figure S6B). However, in contrast to *CASP1*  
242 or *CASP4*-targeting, *GSDMD* knockdown did not impair *IL1A*, *IL1B*, *IL8* or *IL6* mRNA induction (Figure  
243 S6C-D). Moreover, whereas targeting either *CASP1* or *CASP4* resulted in a significantly lower  
244 concentration of IL-1 $\beta$  in conditioned media from OIS cells, *GSDMD* knockdown did not alter IL-1 $\beta$   
245 secretion (Figure S6E), suggesting that IL-1 $\beta$  secretion is dependent on caspase-1 and caspase-4 but  
246 independent on gasdermin-D in OIS. Altogether, these results indicate that the caspase-4 non-  
247 canonical inflammasome is a critical regulator of the SASP in OIS.

248

249 ***The caspase-4 non-canonical inflammasome contributes to the cell cycle arrest in OIS.***

250 To investigate the role of the non-canonical inflammasome in regulating the cell cycle arrest program  
251 in OIS, we targeted *CASP4* using RNAi (Figure S6F). *CASP4*-targeting significantly rescued early  
252 proliferation arrest during OIS (Figure 6A) and increased the total cell content in a long-term cell growth  
253 assay (Figure 6B). Moreover, targeting *CASP4* during OIS modestly but significantly decreased SA- $\beta$ -  
254 galactosidase activity (Figure S6G-H). A GSEA of 50 hallmark gene sets showed a negative regulation  
255 of *CASP4* in *RAS*<sup>G12V</sup>-OIS of the gene signatures “G2M CHECKPOINT” and “E2F TARGETS”, and the  
256 expression of the *CDKN2A* (p16<sup>INK4a</sup>-p14<sup>ARF</sup>) and *CDKN2B* (p15<sup>INK4b</sup>) locus, but not p21<sup>CIP1</sup> (Figure 5B,  
257 6C, S6H). Indeed, targeting *CASP4* reduced p16<sup>INK4a</sup> expression and rescued the phosphorylation of  
258 pRb (Figure 6D, S6I) and resulted in a transcriptional increase in the levels of E2F target genes (Figure  
259 6E), suggesting a role for caspase-4 in cell cycle regulation by controlling p16<sup>INK4a</sup> and p15<sup>INK4b</sup>  
260 expression in OIS. Of note, activation of caspase-4 by intracellular LPS resulted in hypophosphorylated  
261 pRb and increased levels of E2F target genes (Figure S6J-K). Finally, similarly to SASP regulation,  
262 *GSDMD* targeting did not alter the cell cycle arrest in OIS (Figure S6L), suggesting that gasdermin-D  
263 has no significant role in OIS.

264 Altogether, these results suggest that caspase-4 contributes to the proliferation arrest during  
265 senescence, impacting ultimately on the phosphorylation state of pRb resulting in transcriptional  
266 repression of E2F target genes.

267

268

269

270 ***Caspase-11 is induced during cellular senescence in vivo.***

271 We have shown that caspase-4 expression levels are critical in cellular senescence. To investigate  
272 non-canonical inflammasome expression in senescence *in vivo*, we used three well-characterized  
273 mouse models of senescence. We first analysed the caspase-4 murine homologous caspase-11  
274 expression in a model of OIS in which conditional expression of *Kras*<sup>G12D</sup> by *Pdx-CRE* induces  
275 Pancreatic Intraepithelial Neoplasia (PanIN) in the pancreas of mice (Morton et al., 2010) (Figure 7A).  
276 We observed that low grade PanINs stained positive for caspase-11 when compared to surrounding  
277 pancreatic acinar cells, higher grade PanINs, and in the ducts and acinar cells in wild-type mice (Figure  
278 7A). Importantly, quantification of Ki-67 staining in PanINs showed that the expression of caspase-11  
279 was restricted to early senescent lesions with low proliferative index (Figure 7B), indicating that  
280 caspase-11 expression correlates with senescence in low-grade PanIN lesions.

281 We then investigated the expression of caspase-11 in two additional models of senescence *in vivo*. We  
282 detected increased expression of caspase-11 and the markers of senescence lipofuscin in lung airways  
283 in a model of inflammatory mediated activation of senescence by constitutive activation of NF-κB by  
284 knockout of its regulator *nfkb1*<sup>-/-</sup> (*p50*<sup>-/-</sup>) (Jurk et al., 2014) (Figure 7C). Moreover, we observed an  
285 increase in the number of cells positively expressing caspase-11 in alveolar cells of the lung during  
286 organismal ageing (Figure 7D). In summary, these results support the model that non-canonical  
287 inflammasomes contribute to senescence *in vivo*.

288

289 **Discussion**

290 Here, we show that cytoplasmic LPS recognition by the caspase-4 non-canonical inflammasome  
291 induces a senescence response, in which sublethal levels of LPS activate the p16<sup>INK4a</sup>-pRb and p53-  
292 p21<sup>CIP1</sup> tumour suppressor pathways. Interestingly, while LPS-mediated pyroptosis requires caspase-4  
293 and the effector protein gasdermin-D but not p53, the senescence response requires the participation  
294 of p53. These results suggest a mechanism in which p53 controls the cellular stress responses to  
295 microbial infection downstream of caspase-4 until a certain threshold level in which gasdermin-D-  
296 dependent pyroptosis eliminates highly damaged cells, introducing a new context-dependent role for  
297 p53 in innate immune sensing (Kastenhuber and Lowe, 2017). Further research will be necessary to  
298 determine the functional role of senescence in response to infection.

299 Our results describe a new mechanism of senescence induction by cytoplasmic microbial sensing,  
300 adding to the essential triggers such as the DNA Damage Response, telomere attrition, oncogenic  
301 activation, mitochondrial damage or ribosome biogenesis inactivation (Gorgoulis et al., 2019; Pantazi  
302 et al., 2019). We also show that both the expression and the assembly of the caspase-4 non-canonical  
303 inflammasome are triggered upon oncogene activation. Furthermore, we observe that caspase-4 is  
304 critical for SASP induction and contributes to the cell cycle arrest in OIS. Thus, these results suggest  
305 that the role of caspase-4 in senescence is conserved in a sterile context and that there is crosstalk  
306 between anti-microbial immune responses and tumour suppression. Notably, the assembly of the  
307 caspase-4 inflammasome is an early event in OIS, peaking after day three to four after Ras activation  
308 (Figure 4). Recent results suggest that OIS is a highly dynamic process, with distinct signalling waves  
309 contributing to the establishment of the senescent phenotype. Interestingly, the specific time point  
310 where caspase-4 is assembled coincides with the moment of transition to a proinflammatory, NF- $\kappa$ B -  
311 dependent SASP in OIS (Hoare et al., 2016) (Martinez-Zamudio et al., 2020). It is plausible that the  
312 activation of the non-canonical inflammasome could play a critical role in this transition.

313 Unexpectedly, our results indicate that LPS-mediated caspase-4 induced senescence is not  
314 accompanied by robust activation of IL-1 $\beta$  and the SASP. Interestingly, a significant SASP induction is  
315 only achieved when LPS stimulation and priming of the inflammasome with TLR2 ligands happen  
316 simultaneously, suggesting that the control of cellular senescence by caspase-4 is independent of the  
317 SASP. However, our data shows that caspase-4 heavily influences the SASP induction during OIS,  
318 where sustained production of A-SAA signaling through TLR2 is critical to the SASP (Hari et al., 2019).  
319 Thus, caspase-4 appears to be central regulating cell fate decisions occurring upon microbial-  
320 cytoplasmic recognition or sterile cellular stresses controlling the induction of cellular senescence, the  
321 SASP, or pyroptosis. Further research will be required to identify the nature of the signal responsible  
322 for caspase-4 activation during OIS.

323 Mechanistically, our data suggest that the role of caspase-4 in senescence is independent from its  
324 catalytic activity. Caspase-4 is a pattern recognition receptor that binds LPS directly (Shi et al., 2014);  
325 therefore, it is plausible that upon ligand recognition, caspase-4 functions as a scaffold platform for the  
326 activation of downstream senescence pathways in a proteolytic independent fashion. Our data suggests  
327 that pyroptosis is triggered only at a certain threshold of caspase-4 induction, suggesting a dose-  
328 dependent functional split between the caspase-4 pro-senescent and pyroptotic functions.

329 Inflammasomes have shown diverse pro- and anti-tumorigenic functions in cancer (Karki and  
330 Kanneganti, 2019). Here, we show that caspase-4 expression is induced following tumour initiation in  
331 a genetically engineered mouse model of pancreatic cancer and during ageing, suggesting a  
332 suppressive role for this pathway in cancer initiation. In recent years several strategies have been  
333 implemented to eliminate senescent cells or to modulate the activation of the SASP in anti-ageing and  
334 cancer therapies. (Baker et al., 2016; Baker et al., 2011; Dorr et al., 2013). Furthermore, the  
335 pharmacological targeting and removal of senescent cells has been shown to improve homeostasis  
336 following tissue damage and ageing (Baar et al., 2017; Chang et al., 2016). Here we propose that  
337 manipulation of non-canonical inflammasomes could provide a new rationale for senotherapies and the  
338 implementation of pyroptosis for senolysis in cancer and ageing.

339

## 340 **Acknowledgements**

341 We especially thank Maria Christophorou, Alex von Kriegsheim, Noor Gammoh, Andrew Finch, Simon  
342 Wilkinson, Manuel Collado, Claudia Wellbrock, Nick Hastie, Javier Caceres, Liz Patton and all the  
343 members of J.C.A. lab for helpful criticism, discussion and encouragement. This work was supported  
344 by Cancer Research UK (C47559/A16243 Training & Career Development Board - Career  
345 Development Fellowship), University of Edinburgh (Chancellor's Fellowship) and the Wellcome Trust-  
346 ISSF. P.H., I.F.D and N.T. were funded by the University of Edinburgh Chancellor's Fellowship. J.F.P  
347 and J.B. were funded by BBSRC (grant BB/K017314/1). F.R.M is funded by a Wellcome Trust Clinical  
348 Research Fellowship through the Edinburgh Clinical Academic Track (ECAT) (203913/Z/16/Z).

349

## 350 **Author contributions**

351 Conceptualisation, I.F.D and J.C.A.; Formal Analysis, I.F.D, P.H, N.T., J.B., J.F.P. and J.C.A;  
352 Investigation, I.F.D, P.H., F.R.M., N.T., A.Q., J.B., and J.C.A.; Resources, J.C.A and V.G.B.; Data  
353 Curation, I.F.D. and J.C.A; Writing-Original Draft I.F.D and J.C.A.; Writing-Review & Editing, F.R.M.;  
354 Visualisation, I.F.D., N.T., J.B., J.F.P. and J.C.A; Supervision, J.C.A.; Funding Acquisition, J.C.A.

355

## 356 **Declaration of interests**

357 The authors declare that they have no competing interest.

358

359 **Figures Legends**

360

361 **Figure 1**

362 **LPS-mediated caspase-4 activation induces a senescent phenotype in human primary**  
363 **fibroblasts**

364 (A) Scheme of the experiment shown in B-D and Supplementary Figure D-E. IMR90 cells were infected  
365 with an empty pRS vector (vector) or a pRS vector targeting either *CASP1* (shC1) or *CASP4* (shC4)  
366 prior to transfection with 0.1  $\mu\text{g}$  LPS /  $5 \times 10^5$  cells. The acquisition of senescent features after LPS  
367 transfection was assessed by IF, RT-qPCR and SA- $\beta$ -Gal activity.

368 (B) SA- $\beta$ -Gal activity was determined 4 days after transfection. Representative images for SA- $\beta$ -Gal  
369 activity are shown.

370 (C) BrdU incorporation and p16<sup>INK4a</sup>, p21<sup>CIP1</sup> and caspase-4 levels of surviving cells were measured by  
371 IF 48 h after LPS transfection.

372 (D) *CDKN1A* (p21<sup>CIP1</sup>) and *CDKN2A* (p16<sup>INK4a</sup>) mRNA relative expression was quantified by RT-qPCR  
373 48 h after transfection.

374 (E) *CASP4* was stably overexpressed prior to LPS transfection. Cells were transfected with increasing  
375 concentrations of LPS (0.1 or 1  $\mu\text{g}$  LPS /  $5 \times 10^5$  cells) and BrdU incorporation was measured 48 h  
376 after transfection.

377 (F) Cells were treated as in (E) and SA- $\beta$ -Gal activity was determined 4 days after transfection.  
378 Representative images for SA- $\beta$ -Gal activity are shown.

379 (G to I) IMR90 cells were stably infected with an empty pRS vector (vector) or a pRS vector targeting  
380 either *CASP4* (shC4), *GSDMD* (shGSDMD) or *TP53* (shP53) prior to transfection with 0.1  $\mu\text{g}$  LPS /  $5 \times$   
381  $10^5$  cells. BrdU incorporation (G) and the levels of p21<sup>CIP1</sup> (H) and p16<sup>INK4a</sup> (I) were measured by IF 48  
382 h after LPS transfection.

383 Statistical significance in B, D-I was calculated using one-way analysis of variance (ANOVA). Statistical  
384 significance in C was calculated using two-tailed Student's *t*-test. \*\*\*\**P* < 0.0001, \*\*\**P* < 0.001, \*\**P* <  
385 0.01, and \**P* < 0.05. ns, not significant. All error bars represent mean  $\pm$  s.e.m; A represents 4 and B, D-  
386 I represents 3 independent experiments.

387

388

389 **Figure 2**

390 **LPS-mediated caspase-4 induced senescence is independent on inflammasome priming**

391 (A) *IL1B* mRNA relative expression levels were quantified by RT-qPCR in IMR90 infected with *CASP4*,  
392 *CASP1*, *RAS*<sup>G12V</sup> expression vectors or empty vector (vector) control.

393 (B) Cells were treated as shown in Figure 1A. *IL1B* mRNA relative expression was quantified by RT-  
394 qPCR 48 h after LPS transfection.

395 (C-E) IMR90 cells were infected with *CASP4* or *RAS*<sup>G12V</sup> expression vectors or empty vector (vector)  
396 control. After 3 h treatment with Pam2CSK4, cells were transfected with LPS (0.1 µg LPS / 5 x 10<sup>5</sup>  
397 cells). *IL1B* mRNA relative expression (C) and BrdU incorporation (D) were measured by IF and RT-  
398 qPCR respectively 48 h after LPS transfection. (E) SA-β-Gal activity was determined 4 days after LPS  
399 transfection. Representative images are shown.

400 For A and B, sstatistical significance was calculated using one-way analysis of variance (ANOVA). \*\*\*\*P  
401 < 0.0001, \*\*\*P < 0.001, \*\*P < 0.01, and \*P < 0.05. All error bars represent mean ± s.e.m of 3  
402 independent experiments.

403 For C-E, sstatistical significance was calculated using one-way analysis of variance (ANOVA). \*\*\*\*P <  
404 0.0001, \*\*\*P < 0.001, \*\*P < 0.01, and \*P < 0.05. Error bars represent the average ± range of 2  
405 representative experiments.

406

407

408 **Figure 3**

409 **Caspase-4 mediated regulation of senescence is independent of its catalytic function**

410 (A-B) IMR90 cells were infected with wild-type (WT) *CASP4*, catalytically inactive (C258A) *CASP4* or  
411 the empty vector (vector). Overexpression of *RAS*<sup>G12V</sup> was used as a positive control for the induction  
412 of senescence. (A) Caspase-4 levels, BrdU incorporation and SA-β-galactosidase activity were  
413 measured 4 days after equal number of cells were seeded. (B) Relative cell content (left) was quantified  
414 15 days after equal number of cells were seeded; representative images (right) of crystal violet stained  
415 cells are shown.

416 (C) Scheme of the experiment shown in D-F and Supplementary Figure A-B. IMR90 cells were infected  
417 with wild-type (WT) *CASP4*, catalytically inactive (C258A) *CASP4* or the empty vector (vector) prior to  
418 transfection with 0.1 µg LPS / 5 x 10<sup>5</sup> cells.

419 (D) Cell viability was measured 24 h after transfection.

420 (E) BrdU incorporation was measured 48 h after transfection.

421 (F) SA- $\beta$ -Gal activity was determined 4 days after transfection.

422 Statistical significance in A and B was calculated using one-way analysis of variance (ANOVA).

423 Statistical significance in D-F was calculated using two-tailed Student's *t*-test. \*\*\*\**P* < 0.0001, \*\*\**P* <

424 0.001, \*\**P* < 0.01, and \**P* < 0.05. ns, not significant. All error bars represent mean  $\pm$  s.e.m of 3

425 independent experiments.

426

#### 427 **Figure 4**

#### 428 **The caspase-4 non-canonical inflammasome is activated in Oncogene-induced senescence**

429 (A) IMR90 cells were infected with *RAS*<sup>G12V</sup> expression vector to induce OIS or empty vector (vector).

430 BrdU incorporation and SA- $\beta$ -Gal activity were measured 4 days after equal number of cells were

431 seeded (left). Representative images (right) for SA- $\beta$ -Gal activity are shown.

432 (B) *CASP4* mRNA relative expression was quantified in IMR90 cells undergoing *RAS*<sup>G12V</sup> after infection

433 with *RAS*<sup>G12V</sup> expression vector-

434 (C) IMR90 cells were infected with *RAS*<sup>G12V</sup> expression vector or empty vector (vector). BrdU

435 incorporation and caspase-4 levels were measured by IF in *RAS*<sup>G12V</sup>-OIS and control cells 4 days after

436 equal number of cells were seeded.

437 (D) IMR90 cells were infected with a control (ER:STOP) or an ER:RAS vector. Upon addition of 4OHT,

438 ER:RAS cells undergo OIS.

439 (E) Time-course experiment of *CASP4* mRNA relative expression in IMR90 ER:STOP and ER:RAS

440 cells treated with 4OHT for 0, 2, 4, 6 and 8 days.

441 (F) Time-course experiment of *IL1B* mRNA relative expression in IMR90 ER:STOP and ER:RAS cells

442 treated with 4OHT for 0, 2, 4, 6 and 8 days.

443 (G) IMR90 ER:STOP and ER:RAS were treated or not with 4OHT during 8 days. Caspase-4, IL-1 $\beta$  and

444 IL-8 levels were analyzed by immunoblotting.

445 (H) IMR90 ER:STOP and ER:RAS cells were treated with 4OHT for five days, then cells were collected

446 and subjected to disuccinimidyl suberate (DSS) crosslinking. After SDS-PAGE separation, both DSS-

447 crosslinked samples and inputs were probed for caspase-4 by immunoblotting.

448 (I) IMR90 ER:STOP and ER:RAS cells were treated with 4OHT and LEVD-AFC cleavage was  
449 measured in low serum (0.5% FBS) cultured cells 0, 4 and 8 days after 4OHT addition.

450 All statistical significance was calculated using using two-tailed Student's *t*-test. \*\*\**P* < 0.001, \*\**P* <  
451 0.01, and \**P* < 0.05 and ns, not significant. All error bars represent mean ± s.e.m of 3 independent  
452 experiments.

453

## 454 **Figure 5**

### 455 **Caspase-4 activation controls the proinflammatory SASP**

456 (A) Schematic diagram of the experimental approach. ER:STOP and ER:RAS IMR90 cells were  
457 targeted with either control (non-targeting pool, NTP) or *CASP4*-targeting siRNA. All cells were treated  
458 with 4OHT from day 0. RNA was extracted at day 5 and 8 after the addition of 4OHT and subjected to  
459 transcriptomic analysis. Differentially expressed gene (DEG) analysis was performed and the number  
460 of significant upregulated and downregulated genes 5 and 8 after the addition of 4OHT upon *CASP4*-  
461 targeting in ER:RAS cells is shown.

462 (B) Normalized Enriched Scores (NES) of a set of 50 curated hallmark gene signatures were calculated  
463 based on the DEG analysis performed between control and *CASP4*-knockdown ER:RAS samples after  
464 5 and 8 days of 4OHT treatment. Gene sets with a false discovery rate (FDR) *q*-value of ≤ 0.25 at least  
465 in one of the timepoints are shown. *P*-values for each gene set are indicated next to the corresponding  
466 bar.

467 (C) Heatmap of the log<sub>2</sub>FC values of all 175 genes included in the “INFLAMMATORY RESPONSE”  
468 GSEA gene set of control ER:STOP and *CASP4*-knockdown ER:RAS compared to control ER:RAS  
469 after 5 days of 4OHT treatment. The top 25 differentially expressed signature genes in *RAS*<sup>G12V</sup>-OIS  
470 are zoomed in.

471 (D) *IL1A* mRNA relative expression levels were quantified by RT-qPCR after 5 days of 4OHT treatment  
472 in ER:STOP and ER:RAS cells transfected with the indicated siRNA.

473 (E) *IL1B* mRNA relative expression levels were quantified by RT-qPCR after 5 days of 4OHT treatment  
474 in ER:STOP and ER:RAS cells transfected with the indicated siRNA.

475 (F) *SAA1* mRNA relative expression levels were quantified by RT-qPCR after 8 days of 4OHT treatment  
476 in ER:STOP and ER:RAS cells transfected with the indicated siRNA.



477 (G) SAA2 mRNA relative expression levels were quantified by RT-qPCR after 8 days of 4OHT treatment  
478 in ER:STOP and ER:RAS cells transfected with the indicated siRNA.

479 (H) IMR90 ER:STOP/ER:RAS cells were transfected with control (NTP), *CASP1* or *CASP4*-targeting  
480 siRNA and treated with 4OHT or not during 8 days as indicated. Lysates were subjected to  
481 immunoblotting analyses with the indicated antibodies.

482 (I) IMR90 ER:STOP/ER:RAS cells were treated or not 8 days with 4OHT as indicated and secreted IL-  
483  $1\beta$  was quantified by ELISA.

484 Statistical significance in A-E was calculated using one-way analysis of variance (ANOVA).  $**P < 0.01$ ,  
485 and  $*P < 0.05$ . All error bars represent mean  $\pm$  s.e.m of 3 independent experiments.

486

## 487 **Figure 6**

### 488 **Caspase-4 contributes to the cell cycle arrest program in OIS**

489 (A) IMR90 ER:STOP and ER:RAS cells were transfected with control (NTP), two individual *CASP4*-  
490 targeting siRNAs or a pool of 4 different siRNA sequences targeting *CASP4*, and treated with 4OHT or  
491 not as indicated. BrdU incorporation was measured by IF 5 days after 4OHT addition.

492 (B) IMR90 ER:STOP/ER:RAS cells were stably transfected using retroviral shRNA vectors targeting  
493 *CASP4* or *TP53*. Infection with the empty vector (vector) was used as control. On day 0, equal number  
494 of cells were subjected to 4OHT treatment. Fifteen days after 4OHT addition, plates were fixed and  
495 stained with crystal violet. Crystal violet was extracted and used to quantify cell content.

496 (C) Related to Figure 5A. DEG analysis between control ER:STOP and *CASP4*-knockdown ER:RAS  
497 compared to control ER:RAS after 5 days of 4OHT treatment was performed. Heatmap of the log<sub>2</sub>FC  
498 values from the indicated genes.

499 (D) IMR90 ER:STOP and ER:RAS cells were transfected with control (NTP), *CASP1* or *CASP4*-  
500 targeting siRNAs and treated with 4OHT during 4 days. Cell lysates were subjected to immunoblotting  
501 analyses with the indicated antibodies.

502 (E) mRNA relative expression of the indicated genes in IMR90 ER:RAS cells transfected with control  
503 (NTP) *CASP1* or *CASP4*-targeting siRNA was quantified by RT-qPCR after 5 days of 4OHT treatment.  
504 Statistical significance in A and B was calculated using two-tailed Student's *t*-test. Statistical  
505 significance in E was calculated using one-way analysis of variance (ANOVA).  $***P < 0.001$ ,  $**P < 0.01$ ,  
506  $*P < 0.05$  and ns, not significant. All error bars represent mean  $\pm$  s.e.m of 3 independent experiments.

507 **Figure 7**

508 **Caspase-11 expression is induced in senescence *in vivo*.**

509 (A) Immunohistochemistry showing Ki-67 and caspase-11 staining in sections from *Pdx-cre WT* and  
510 *Pdx-cre Kras<sup>G12D</sup>* pancreas (left panels). Black arrows indicate acinar pancreatic cells, white arrows  
511 indicate PanIN cells. Close up images showing PanINs with high and low expression of caspase-11  
512 (Right panel).

513 (B) Quantification of Ki-67 positive cells of total PanIN cells from a total of 11 mice of 7 to 15 weeks of  
514 age. PanINs were classified according to the expression of caspase-11 as indicated. The percentage  
515 of Ki-67 positive cells was calculated scoring all cells of PanINs classified as high or low caspase-11  
516 expression per mouse as indicated. Scatter plots were generated from total cells from high and low  
517 caspase-11 expressing PanINs with individual points representing the mean Ki-67 percentage positivity  
518 for each mouse, with horizontal lines representing group mean and s.e.m. Statistics: Mann Whitney U  
519 test. \*\*\*p < 0.001

520 (C) Analysis of caspase-11 expression was conducted by immunohistochemistry in lung sections from  
521 wild type (WT) or *nfk1* knock out mice (*nfk1<sup>-/-</sup>*) at 9.5 months of age. 10-15 random images were  
522 captured per mouse and average percentage positivity calculated for airway epithelial compartments.  
523 Scatter plots represent mean percentage positivity for each animal with horizontal line representing  
524 group median. Broad-band autofluorescence (an indicator of lipofuscin accumulation) was acquired  
525 from paraffin-embedded sections excited at 458 nm with fluorescence emission captured above 475  
526 nm using a fluorescence microscope (Leica DM550B). Fluorescence intensity was analyzed using  
527 ImageJ. At least 10 small airways were analyzed per mouse and an average intensity calculated per  
528 animal. Scatter plots represent average value per animal with the horizontal line representing group  
529 median. Statistics: Mann Whitney U test. \*p < 0.05, \*\*p < 0.01 Representative images Casp4 staining  
530 by immunohistochemistry in airway epithelial cells from wt and *nfk1<sup>-/-</sup>* mice, captured using x40  
531 objective.

532 (D) Analysis of caspase-11 expression by immunohistochemistry in lung sections of wt mice at 6.5  
533 months of age (Young) and 24 months of age week (Old). Scatter plots were generated from 10-15  
534 random images captured per animal with individual points representing mean percentage positivity for  
535 each mouse with horizontal line representing group median. Statistics: Mann-Whitney U test. \*p < 0.05.

536 Representative images of caspase-11 staining by immunohistochemistry (positive, brown; negative,  
537 blue) in alveolar cells from wt mice 6.5 and 24 months of age, captured using x40 objective.

## Figure 1

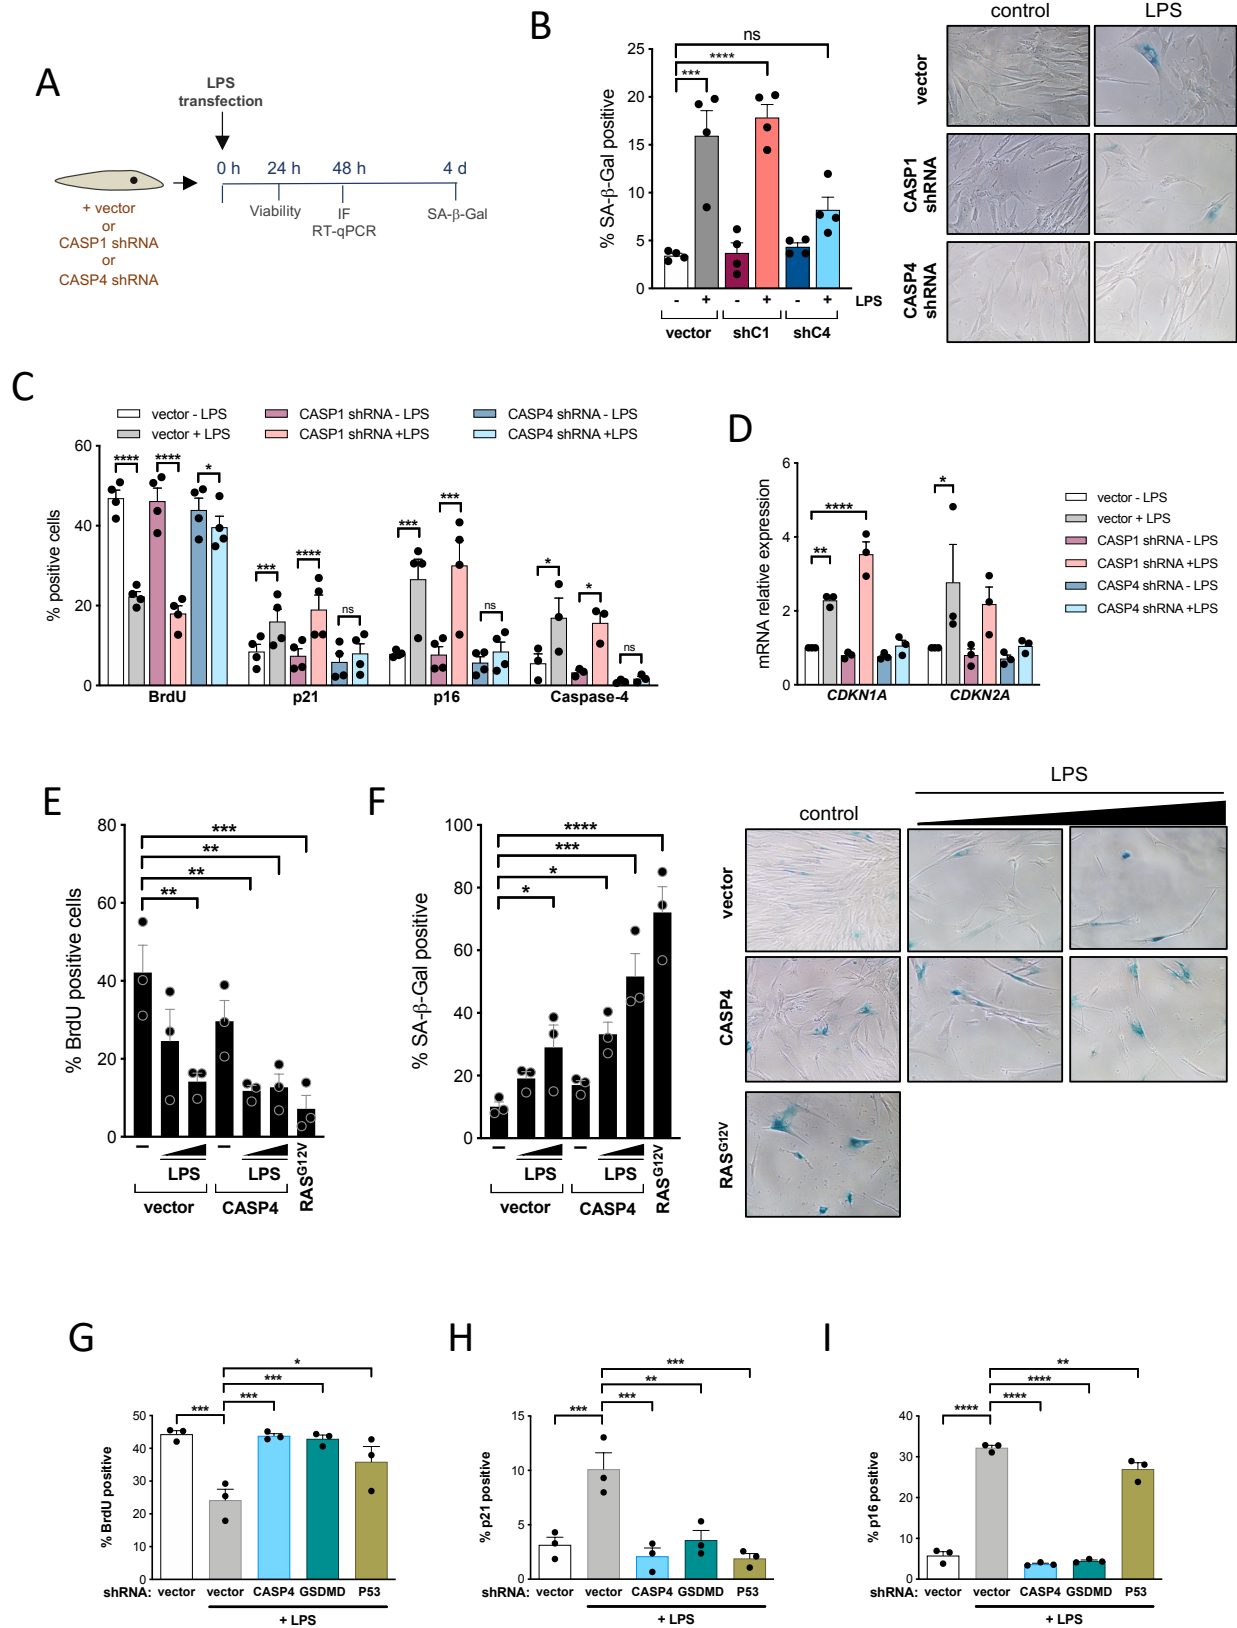

## Figure 2

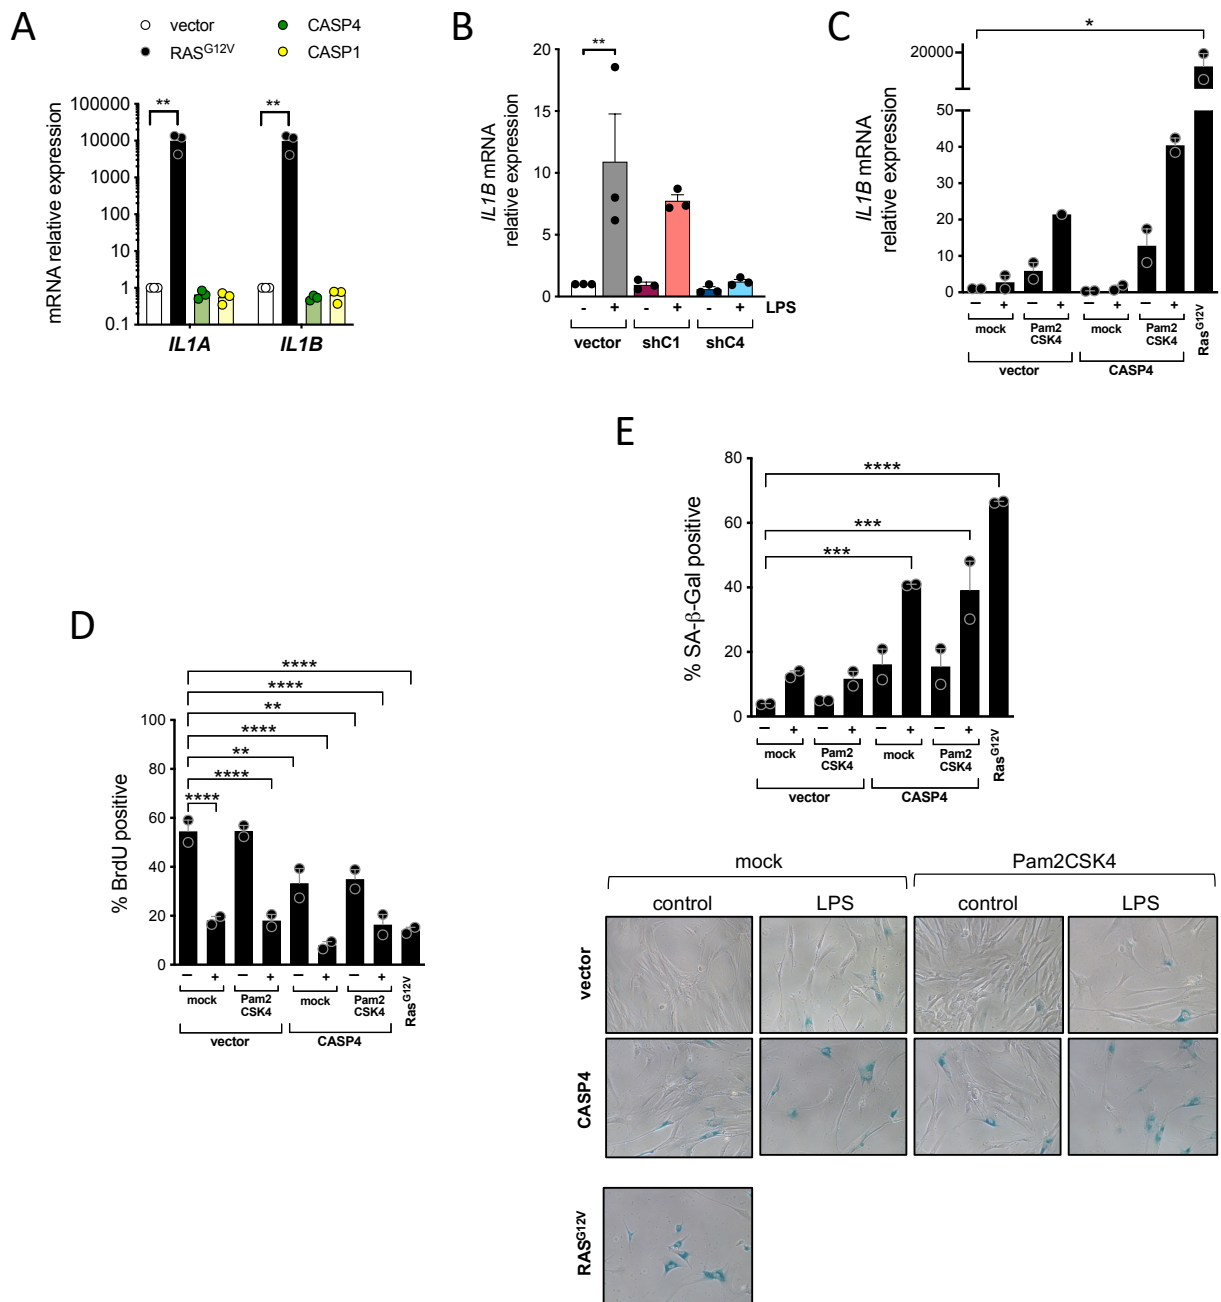

## Figure 3

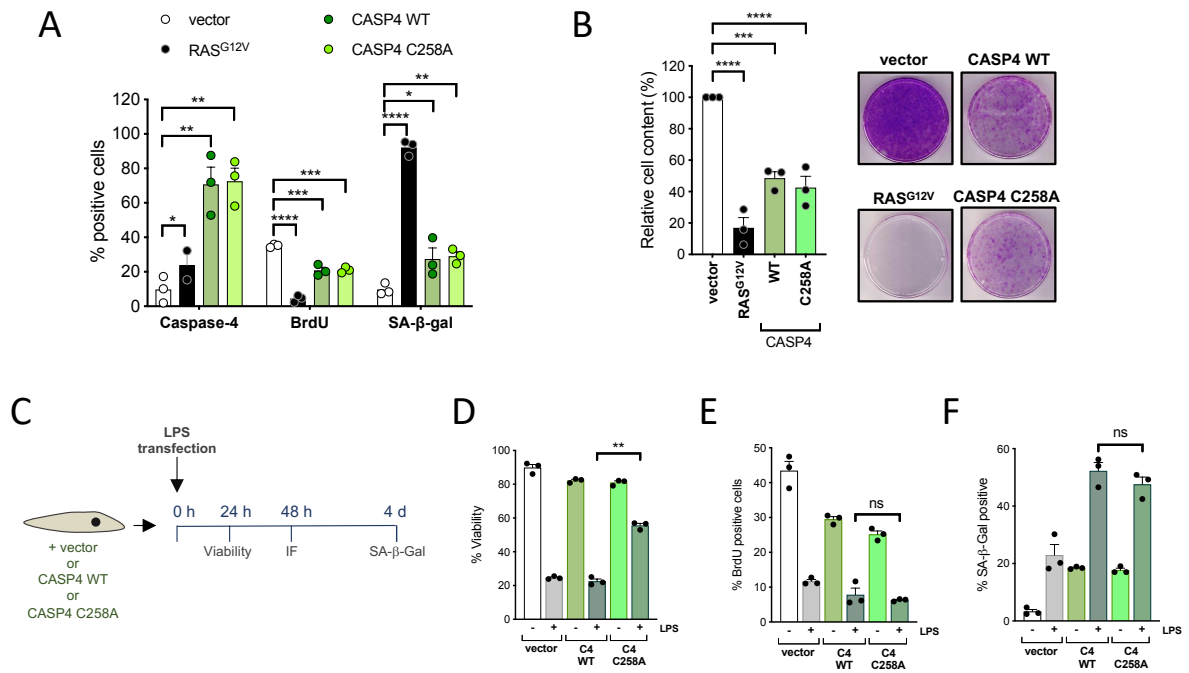

## Figure 4

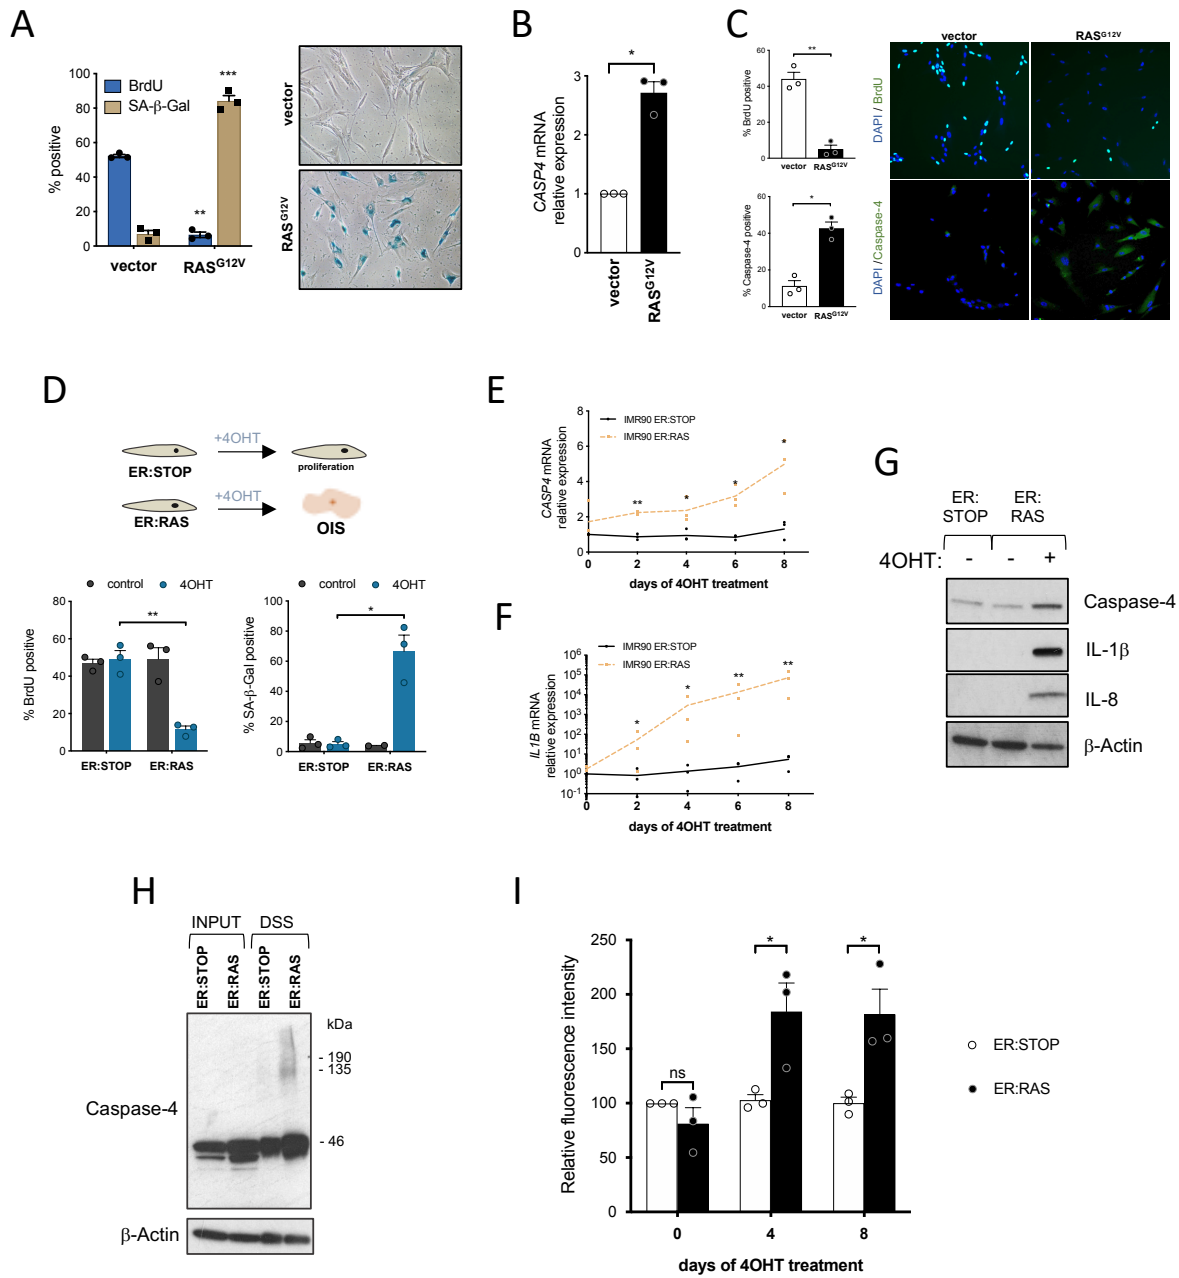

## Figure 5

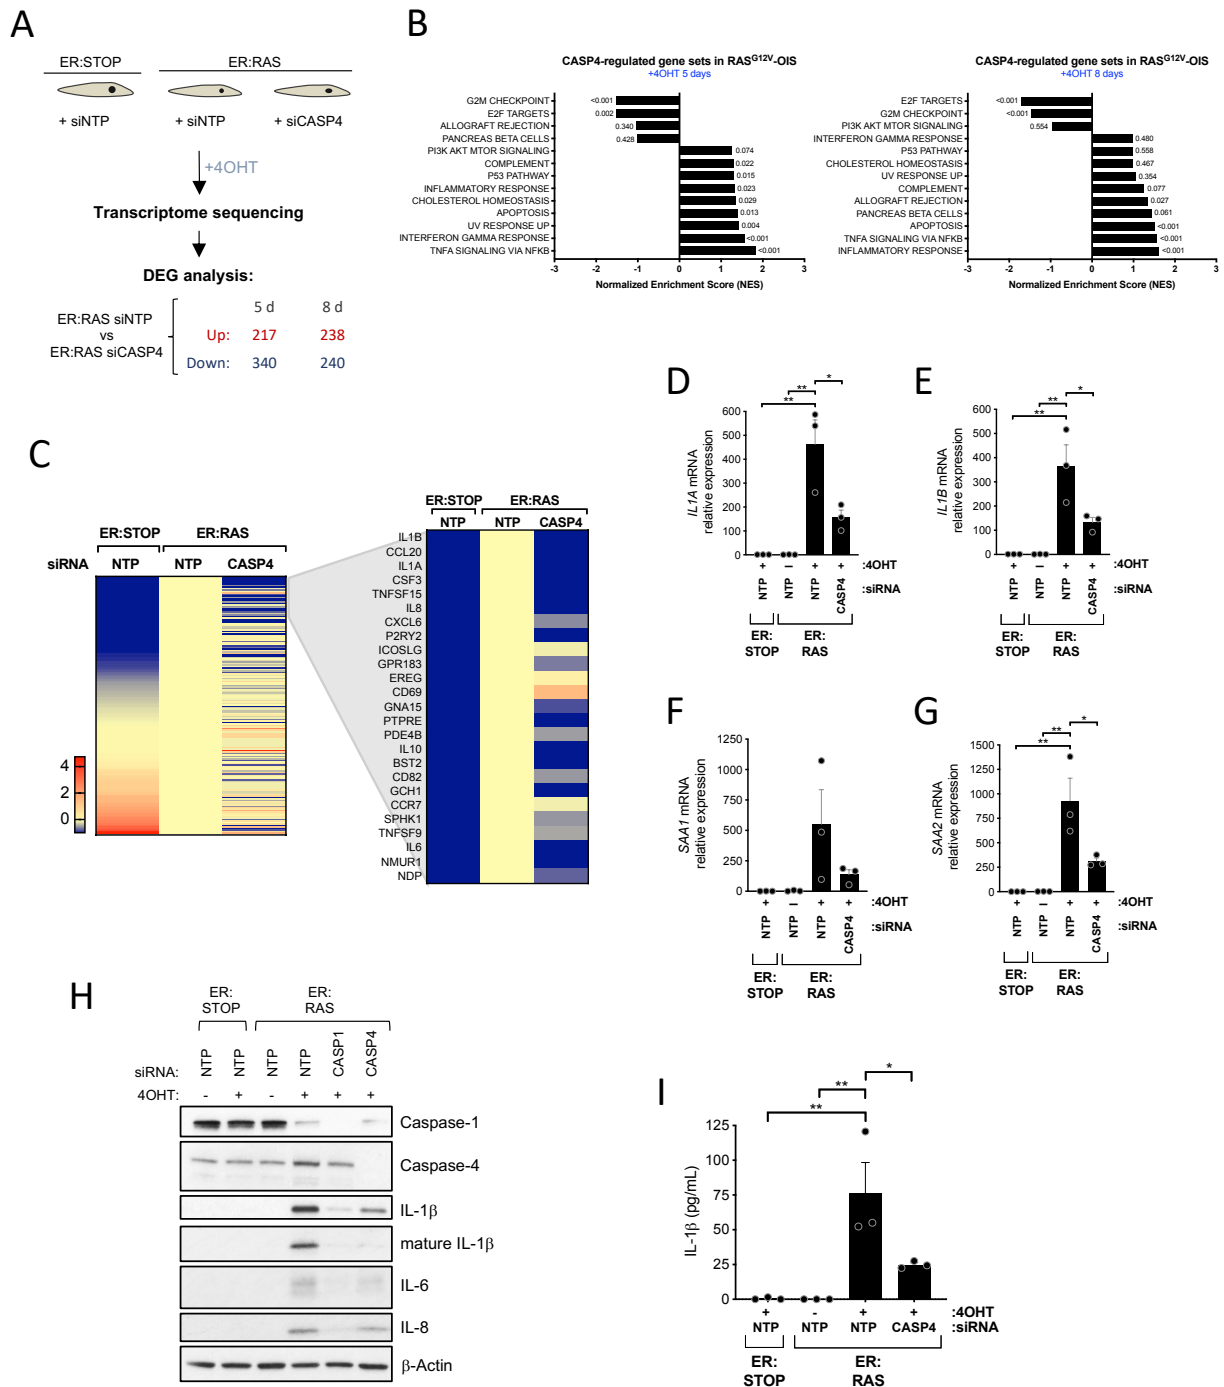



## Figure 6

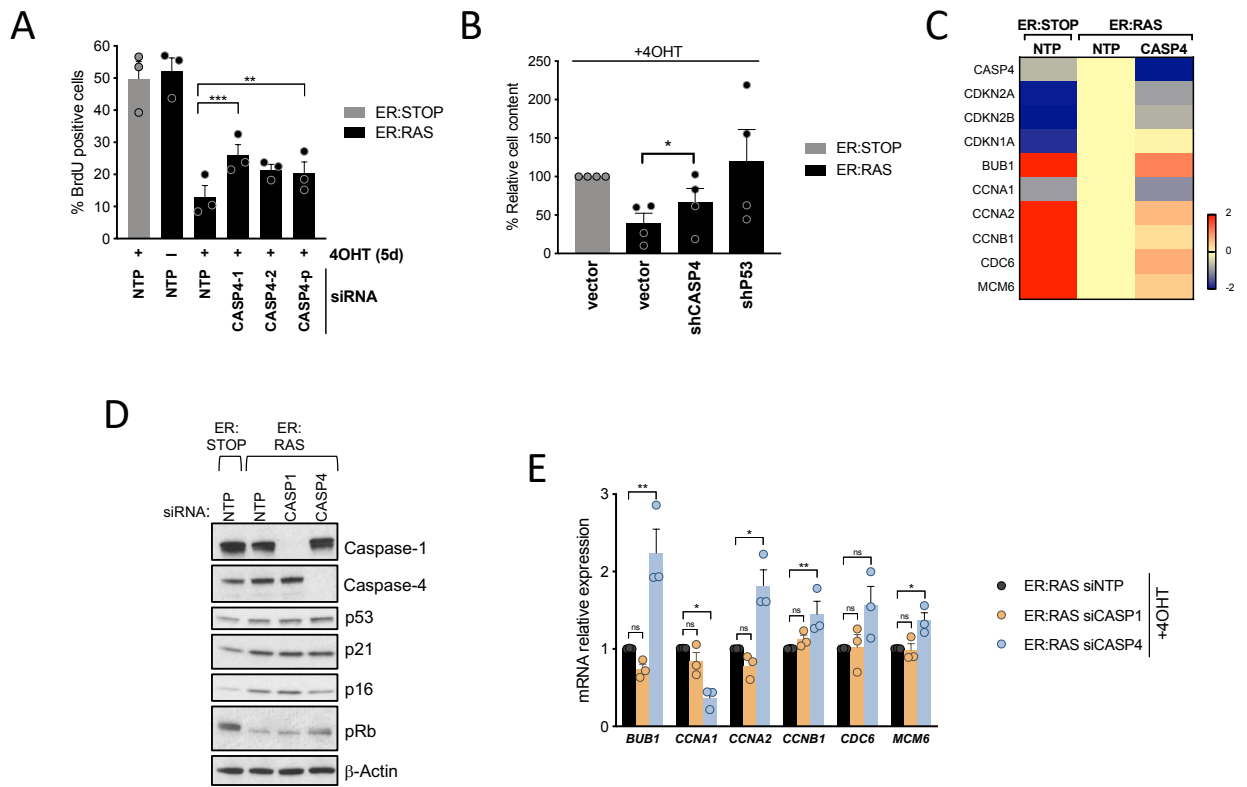

## Figure 7

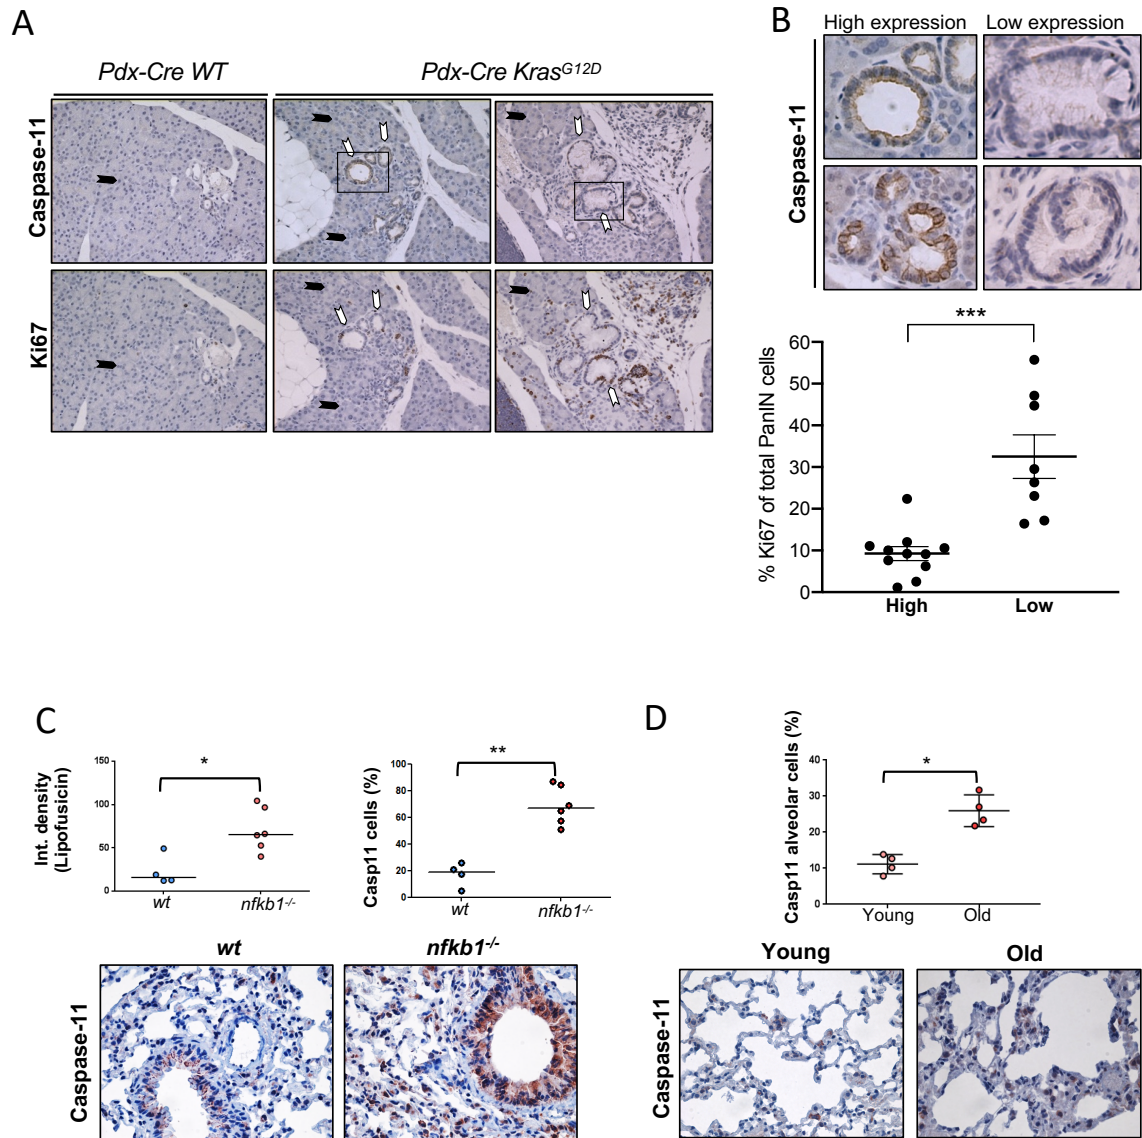

536 **Methods**

537

538 **RESOURCE AVAILABILITY**

539 **Lead Contact and Materials Availability**

540 Further information and requests for resources and reagents should be directed to and will be  
541 fulfilled by the Lead Contact, Juan-Carlos Acosta ([juan-carlos.acosta@igmm.ed.ac.uk](mailto:juan-carlos.acosta@igmm.ed.ac.uk)).

542

543 **Data and Code Availability**

544 The transcriptomic data generated during this study is available at GEO.

545

546 **EXPERIMENTAL MODEL AND SUBJECT DETAILS**

547 HEK293T and IMR90 female human fetal lung fibroblast cells were obtained from American  
548 Type Culture Collection. All cell lines were maintained in Dulbecco's Modified Eagle's Medium  
549 (DMEM) (Sigma), supplemented with 10% Fetal Bovine Serum (FBS) (ThermoFisher) and 1%  
550 antibiotic-antimycotic solution (ThermoFisher). All cell lines were cultured at 37°C with 5%  
551 CO<sub>2</sub> and tested for mycoplasma on a regular basis. All cell lines were regularly tested for  
552 mycoplasma contamination using the Mycoalert Mycoplasma Detection Kit (Lonza). Cell  
553 counting and viability were performed Muse® Count & Viability Assay Kit in a Muse Cell  
554 Analyser (Merck Millipore).

555

556 **METHOD DETAILS**

557 **Chemical compounds and treatments**

558 OIS was induced by treating IMR90 ER:RAS cells with 100 nM 4OHT. IMR90 ER:RAS and  
559 control ER:STOP were maintained in standard media supplemented with 200 µg/ml geneticin.  
560 To induce oncogene induced senescence, IMR90-ER:RAS cells were treated  
561 with 100 µM etoposide for 48 hours, followed by 5 days in normal culture media. For DNA  
562 damage-induced senescence, IMR90 cells were treated with 10 µM Etoposide for 48 hours.  
563 For non-canonical inflammasome activation and inflammasome priming experiments,

564 ultrapure lipopolysaccharide (LPS) from E. coli 111:B4 (Invivogen), muramyl dipeptide (MDP)  
565 (Tocris), Pam2CSK4 (Tocris), Pam3CSK4 (Tocris), Recombinant Human Apo-SAA (A-  
566 SAA)(Peprotech) and BSA (Sigma) were used. For priming time-course experiments, the  
567 following concentrations were used: LPS (1 µg/ml), MDP (1 µg/ml), Pam2CSK4 (50 ng/ml),  
568 Pam3CSK4 (500 ng/ml). To prime inflammasomes prior to LPS transfection, cells were treated  
569 with Pam2CSK4 (1 µg/ml) A-SAA (10 µg/ml) or BSA (10 µg/ml) for 3 hours.

570

### 571 **Cell quantification and viability**

572 To determine viable cell concentration of cultures, cells were washed and incubated with  
573 trypsin (ThermoFisher) for 5 min at 37 °C. Fully detached cells were collected by  
574 centrifugation, resuspended in Muse Count & Viability Reagent (Merck Millipore), and counted  
575 using the Muse Cell Analyzer (Merck Millipore). To determine cell viability, culture  
576 supernatants and attached cells were pooled together before centrifugation. Pellets were  
577 resuspended in Muse Count & Viability Reagent (Merck Millipore) and analysed using the  
578 Muse Cell Analyzer (Merck Millipore).

579

### 580 **LPS transfection**

581 To electroporate LPS or MDP, the Neon Transfection System (Invitrogen, MPK5000) and the  
582 Neon Transfection System 100 µL Kit (MPK10025) were used. Per each tip,  $5 \times 10^5$  cells  
583 were transfected with the indicated amount of LPS or MDP. Electroporation parameters were  
584 set at 1500V, 30 ms and pulse number 1 for IMR90 cells and 1100V, 20 ms and pulse number  
585 2 for HEK293T cells. Once electroporated, the tip content was unloaded into a clean  
586 Eppendorf tube and tubes were centrifuged on a bench-top centrifuge at 3000 rpm 3 min.  
587 Supernatant was removed to avoid any traces of MDP or LPS in the extracellular media prior  
588 to plating.

589

590

591

## 592 **Conditioned medium for paracrine senescence transmission**

593 For the production of conditional medium (CM), IMR90 ER:STOP and ER:RAS cells were  
594 cultured as previously described (Boumendil et al., 2019). IMR90 ER:STOP and ER:RAS cells  
595 were cultured with DMEM supplemented with 100 nM 4OHT and 10% FBS for 4 days, and  
596 with DMEM 100 nM 4OHT and 1% FBS for 4 additional days. CM was filtered using 0.2 µm  
597 syringe filters (Millipore) and reconstituted with a solution of DMEM supplemented with 40%  
598 FBS at a 3:1 ratio.

599

## 600 **Generation of plasmids**

601 Using standard retro-transcription procedures, total RNA extracted from IMR90 cells was  
602 converted into cDNA generating a human coding sequence (CDS) library. CASP1 and CASP4  
603 CDS were amplified from the obtained library and cloned into the pMSCV-puro vectors. The  
604 caspase-4 catalytically dead C258A pMSCV-puro vector was generated from the wild-type  
605 pMSCV-puro-CASP4 through site-directed mutagenesis by PCR using the Q5 Site-Directed  
606 Mutagenesis Kit (New England Biolabs). The CASP4 and GSDMD-targeting lentiviral vectors  
607 (pGIPZ) were purchased from Dharmacon. The CASP4-targeting retroviral vector (pRS-  
608 shCASP4) was generated inserting the oligonucleotide (+)  
609 GATCCCCCAACGTATGGCAGGACAAATTCAAGAGATTTGTCCTGCCATACGTTGTTTTTG  
610 into the pRS empty backbone following the pSuper RNAi System manual (OligoEngine)  
611 instructions. pLN-ER:RAS, LSXN-ER:Stop, MSCV-Ras<sup>G12V</sup>, pCMV-VSVG, and pUMVC3-gag-  
612 pol vectors have been described elsewhere (Acosta et al., 2013).

613

## 614 **Retroviral and lentiviral production and infection**

615 For retroviral production, 20 µg retroviral plasmid were cotransfected with 2.5 µg pCMV-VSVG  
616 envelope plasmid and 7.5 µg pUMVC3-gag-pol helper vector using polyethylenimine linear  
617 (Alfa Aesar) into HEK293T cells. For lentiviral production, 10 µg lentiviral plasmid were  
618 cotransfected with 2.5 µg pCMV-VSVG and 7.5 µg psPAX2 using polyethylenimine linear (Alfa

619 Aesar) into HEK293T cells. Viral supernatant was collected from the HEK293T cells 2 days  
620 after transfection and passed through a 0.45  $\mu\text{m}$  syringe filter (ThermoFisher). The viral  
621 supernatant was complemented with hexadimethrine bromide (Sigma) to a final  
622 concentration of 4  $\mu\text{g}/\text{mL}$ . When performing retroviral infections, IMR90s were treated with  
623 fresh viral supernatant and subsequent viral supernatant collection and incubation of IMR90  
624 cells was performed every 3 hours until three rounds of infection were performed. For lentiviral  
625 infections, a single 3 hour incubation with 1:10 dilution of viral supernatant was performed. In  
626 both cases viral supernatant was removed after the indicated rounds of infection, fresh media  
627 was added to IMR90 cells and, 2 days later, selection with puromycin (1  $\mu\text{g}/\text{ml}$ )  
628 (ThermoFisher) was initiated. Before set-up, fresh standard media supplemented with the  
629 selection agent was added for over a week or until no alive cells were observed in control cells  
630 infected with a non-containing selection marker vector.

631

### 632 **siRNA transfection**

633 ON-TARGETplus siRNAs were obtained from Dharmacon. Sequences and IDs are detailed  
634 in the Key Resources Table. For all transfections, 30 nM siRNA were incubated up to 1 hour  
635 with Dharmafect 1 (Dharmacon, 1  $\mu\text{g}/\text{ml}$  final use concentration) to allow the formation of  
636 siRNA:transfection agent complexes prior to transfection. On day 0, 200.000 IMR90 ER:STOP  
637 and ER:RAS cells were plated in each T-6 well, 4OHT was added and siRNA reverse  
638 transfections performed. Due to the transient nature of siRNA, cells were split 1:4 on day 3  
639 and reverse transfections were repeated. To maintain the knockdown during 8 days, forward  
640 transfections were performed again on day 5.

641

### 642 **Total RNA preparation and quantitative reverse transcription polymerase chain** 643 **reaction (qRT-PCR)**

644 Cell lysates were homogenized using QIAshredder (Qiagen) and RNA was extracted using  
645 the RNeasy Plus Mini kit (Qiagen). RNA was transformed into cDNA using qScript cDNA  
646 Supermix (Quanta Biosciences) following manufacturer's instructions. To perform quantitative

647 PCRs, samples were prepared in triplicates in 96-well plates. Each well contained 1  $\mu$ L of  
648 cDNA, 200 nM forward primer, 200 nM reverse primer, 1x SYBR Select Master Mix (Applied  
649 Biosystems) and up to 20  $\mu$ L of ultrapure DNase/RNase-free distilled water (ThermoFisher).  
650 Plates were loaded into a StepOnePlus Real-Time PCR System (ThermoFisher) and the  
651 following PCR cycling parameters were used: 10 min at 95 °C; 40 cycles of 15 s at 95 °C, 30  
652 s at 60 °C and 15 s at 72 °C; 15 s at 95 °C. Data was analyzed using the double Delta Ct  
653 method. The housekeeping gene ACTB was used to normalize data. Primers are specified in  
654 the Table S1.

655

### 656 **Immunofluorescence and high-content microscopy**

657 Cells were fixed with 4% paraformaldehyde (FD NeuroTech) in PBS during 45 min. All  
658 incubations were performed at room temperature and on an orbital shaker. To permeabilize  
659 cells, cells were incubated with 0.2% Triton-X100 in PBS for 10 min. Cells were blocked with  
660 immunofluorescence blocking buffer (1% Bovine Serum Albumin (BSA) and 0.2% Fish Gelatin  
661 in PBS). Primary and secondary antibodies were diluted in immunofluorescence blocking.  
662 Anti-BrdU primary solution was supplemented with 0.5 U /  $\mu$ L DNase (Sigma) and 1 mM  
663 MgCl<sub>2</sub> to improve anti-BrdU access to DNA-bound BrdU. Nuclei were stained with 1  $\mu$ g/mL  
664 4',6-diamidino-2-phenylindole (DAPI) (Molecular Probes). Antibodies are listed in the Key  
665 Resources Table. Immunofluorescence was analyzed using the high-content High-Content  
666 Image Acquisition and Analysis software (Molecular Devices) as previously described  
667 (Boumendil et al., 2019). One-wavelength images of the same frame were merged using the  
668 software Fiji (ImageJ).

669

### 670 **Western blot analysis**

671 Whole cells were lysed in 1X Cell Lysis Buffer Cell (Cell Signalling) supplemented with  
672 cComplete EDTA-free Protease Inhibitor Cocktail (Roche). Protein concentration was  
673 determined by the Bradford assay using the Bradford reagent (Biorad) and BSA pre-set  
674 standards (ThermoFisher) to construct a standard curve. To prepare samples for sodium

675 dodecyl sulfate polyacrylamide gel electrophoresis (SDS-PAGE), 15 µg of protein were mixed  
676 with 6 µL 6x reducing Laemmli SDS sample buffer (Alfa Aesar) in a final volume of 36 µL.  
677 Samples were boiled 5 min at 95 °C and loaded in pre-cast Novex Tris-Glycine gels  
678 (Invitrogen). Pre-cast gels were run in an XCell SureLock™ Mini-Cell Electrophoresis tank  
679 (ThermoFisher) at 100 – 140 V. Proteins were transferred into nitrocellulose membranes using  
680 the iBlot Gel Transfer Device (ThermoFisher). Membranes were blocked in Tris-buffered  
681 saline (TBS) buffer (25 mM Tris-HCl + 137 mM NaCl + 2.7 mM KCl, pH7.4) supplemented  
682 with 5% non-fat milk 1 h at room temperature on a rocking shaker. Primary and secondary  
683 antibodies (described in the Key Resources Table) were diluted in TBS 5% milk buffer. To  
684 visualize bands, membranes were incubated with enhanced chemiluminescence solution (GE  
685 Healthcare) and exposed to X-ray films (GE Healthcare).

686

#### 687 **Caspase-4 fluorometric activity assay**

688 To measure LEVD-AFC cleavage, the Caspase 4 Fluorometric Assay kit (Fluorometric) was  
689 used following manufacturer's instructions.  $2 \times 10^6$  IMR90 ER:STOP or ER:RAS cells were  
690 lysed in 50 µL cell lysis buffer. The assay was conducted in black sterile 96-well polystyrene  
691 plate (ThermoFisher). Fluorescence was measured (excitation filter: 400 nm; emission filter:  
692 505 nm) using an Infinite® 200 PRO (Tecan) plate reader.

693

#### 694 **Detection of caspase-4 oligomerization**

695 Fresh IMR90 ER:STOP or ER:RAS cell pellets were resuspended in 0.5 ml of ice-cold buffer  
696 A (20 mM HEPES-KOH, pH 7.5; 10 mM KCl; 1.5 mM MgCl<sub>2</sub>; 1 mM EDTA; 1 mM EGTA; 320  
697 mM sucrose), lysed by shearing 10 times through a 25-gauge needle, and centrifuged 8 min  
698 at 1.800 g at 4 °C. At this point, 30 µL of lysates were kept as input controls. Remaining  
699 supernatants were diluted with 1 volume of CHAPS buffer (20 mM HEPES-KOH, pH 7.5; 5  
700 mM MgCl<sub>2</sub>; 0.5 mM EGTA; 0.1 mM PMSF; 0.1% CHAPS) and centrifuged 8 min at 5,000 x g.  
701 Supernatants were discarded and pellets were resuspended in 50 µL of CHAPS buffer  
702 containing 4 mM of disuccinimidyl suberate (DSS) during 30 min at room temperature to cross-



703 link proteins. Then, samples were centrifuged 8 min at 5,000 x g at 4 °C, supernatants  
704 discarded and pellets resuspended in 60 µL of protein loading buffer (25 mM Tris-HCl, pH 6.8;  
705 1% SDS; 10% glycerol; 6.25 mM EDTA; 0.01% bromophenol blue). Samples were heated for  
706 2 min at 90 °C and 18 µL of resuspended cross-linked pellets were loaded onto a 4-12% pre-  
707 cast Novex Tris-Glycine gels (Invitrogen). Further immunodetection of caspase-4 was  
708 performed following standard western blotting procedures.

709

#### 710 **Determination of IL-1 $\beta$ content in conditioned media**

711 Conditioned media was collected, centrifuged 10 min at 1000 rpm at 4 °C and transferred to  
712 a clean tube. Released IL-1 $\beta$  was quantified using the Human IL-1 beta ELISA Ready-Set-  
713 Go! Kit (ThermoFisher) following the manufacturer's instructions. Conditioned media IL-1 $\beta$   
714 concentrations were deducted interpolating the data from the standard curve, as previously  
715 described (Fernandez-Duran et al., 2019).

716

#### 717 **Cell proliferation assays**

718 5-bromo-2'-deoxyuridine (BrdU) incorporation was used to measure the number of cells  
719 actively replicating DNA. Cells were incubated with 10 µM BrdU (Sigma) for 16 to 18 hours.  
720 Cells were stained for immunofluorescence and high-content microscopy as described.

721 To analyze long-term growth, low equal amounts of cells were plated in 10 cm diameter  
722 dishes. Media was changed every 3 days and cells were fixed two weeks after initial seeding  
723 with 0.5% glutaraldehyde (Sigma) in PBS for 20 min and left drying overnight. Dishes were  
724 stained with 0.2% crystal violet for 3 hours, washed twice with tap water and dried. To quantify  
725 cellular mass, cell-bound crystal violet was extracted in 10% acetic acid, equal amounts were  
726 transferred to a spectrophotometer-compatible 96-well plate and absorbance was read at 595  
727 nm.

728

729

730 **SA- $\beta$ -Galactosidase assay**

731 5 x 10<sup>4</sup> IMR90 cells per well were seeded in 6-well plates. Four days later, cells were fixed  
732 with 0.5% glutaraldehyde (Sigma) in PBS during 10 min. Fixed cells were washed three times  
733 with PBS 1 mM MgCl<sub>2</sub> pH 5.7, before adding to each well 2 mL of pre-warmed X-Gal staining  
734 solution (2 mM MgCl<sub>2</sub>, 5 mM K<sub>4</sub>Fe(CN)<sub>6</sub> • 3H<sub>2</sub>O, 5 mM K<sub>3</sub>Fe(CN)<sub>6</sub>, 1 mg/mL X-Gal solution  
735 ready to use (ThermoFisher) in PBS). Plates were incubated for 2-24 h at 37 °C, washed and  
736 imaged. SA- $\beta$ -Gal activity positive and negative cells were quantified using FIJI/ImageJ.

737

738 **AmpliSeq transcriptome profiling**

739 RNA quality was assessed on the Bioanalyser 2100 Electrophoresis Instrument (Agilent) with  
740 the RNA 6000 Nano Kit (Agilent). Samples were quantified using the Qubit 2.0 fluorometer  
741 and the Qubit RNA Broad Range assay. 10 ng of RNA was reverse-transcribed to cDNA, and  
742 target genes were amplified for 12 cycles of PCR using the Ion AmpliSeq Human Gene  
743 Expression Core Panel (ThermoFisher). This panel contains a pool of 20,802 amplicons  
744 (41,604 primers) of approximately 150 bases in length. Ion Torrent sequencing adapters and  
745 barcodes Ion Xpress™ Barcode Adapters (Ion Xpress™ Barcode Adapters) were ligated to  
746 the amplicons and adapter-ligated libraries were purified using AMPure XP beads. Libraries  
747 were quantified by qPCR and diluted to 100 pM before being combined in equimolar pools of  
748 8 per each Ion PI Chip Kit v3 (ThermoScientific). Sequencing was performed using the Ion PI  
749 Hi-Q Sequencing 200 Kit (ThermoFisher). Sequence reads were mapped to the  
750 hg19\_AmpliSeq\_Transcriptome\_ERCC\_v1.fasta reference. BAM files were generated using  
751 the Torrent Suite software v 5.2.0 (ThermoFisher). Differentially expressed gene (DEG)  
752 analysis was performed with the DESeq2 package v.1.20.0. Gene Set Enrichment Analysis  
753 (GSEA) was performed using the Broad Institute GSEA software v3.0. DEG-obtained log<sub>2</sub>FC  
754 values were used as inputs for the GSEA. Molecular signatures were obtained from MSigDB  
755 v.6.2.

756

757

758 **Experiments with mice**

759 Experiments were performed according to UK Home Office regulations. Mice carrying a  
760 conditional *Pdx1-Cre Kras<sup>G12D/+</sup>* allele were used and have been described previously (Morton  
761 et al., 2010). Sections of formalin-fixed paraffin-embedded mouse pancreas from 6 to 14-  
762 week-old mice were stained with antibody against Ki67 and Caspase-4. Caspase-4 signal was  
763 used to classify high and low Caspase-4 expressing PanIN. Aging experiments were carried  
764 out on male wild-type C57BL/6 mice or male *nfkb1<sup>-/-</sup>* mice on a pure C57BL/6 background at  
765 6.5, 9.5 and 24 months of age.

766

767 **Immunohistochemistry**

768 For the *Pdx1-Cre Kras<sup>G12D/+</sup>* mice (PanIN), Using EnVision™ +Dual Link system-HRP (DAB+)  
769 kit (K4065, Dako), sections of formalin-fixed paraffin-embedded mouse pancreas were stained  
770 with antibody against Ki67 (ab21700, Abcam). The total number of Ki67 positive cells per  
771 PanIN, and the total cells per PanIN were counted, and thus the percentage of Ki67 positive  
772 cells per PanIN was calculated. The mean score for each mouse was calculated and these  
773 scores were plotted scatter plot. Consecutive sections were stained with antibodies against  
774 Caspase 4/11 (bs-6858R, Bioss). The stainings were examined and classified for high or low  
775 expression of the respective antibodies, and each structure compared with the Ki67  
776 percentage.

777 For *nfkb1<sup>-/-</sup>* and aging mice analysis, sections were dewaxed in histoclear (5 min), rehydrated  
778 through graded ethanol solutions (100, 90, and 70%) and washed in distilled H<sub>2</sub>O.  
779 Endogenous peroxidase activity was blocked by immersing sections in 0.3% H<sub>2</sub>O<sub>2</sub> (Sigma,  
780 H1009) diluted in H<sub>2</sub>O for 30 min. To retrieve antigens, sections were boiled in 0.01 M citrate  
781 (pH 6.0). Sections were blocked in normal goat serum diluted 1:60 in 0.1% BSA in PBS.  
782 Sections were incubated with the primary antibody overnight at 4°C for Caspase 4/11 (bs-  
783 6858R, Bioss). Biotinylated secondary antibody was added and detected using the rabbit  
784 peroxidase ABC kit (Vector Laboratories, PK-4001), according to the manufacturer's  
785 instructions. Substrate was developed using the NovaRed kit (Vector Laboratories, SK-4800).

786 Nuclei were counterstained with heamatoxylin, and sections were dehydrated through graded  
787 ethanol solutions, cleared in xylene, and mounted in di-nbutylehthalate in xylene (Thermo  
788 Scientific, LAMB-DPX). Staining was analysed with a NIKON ECLIPSE-E800 microscope, and  
789 images were captured with a Leica DFC420 camera using the LAS software (Leica). 10-15  
790 random images were captured per section and the percentage of positively stained cells  
791 determined from total number of cells before an average per mouse was calculated.

792

### 793 **Broad-band autofluorescence (lipofuscin accumulation) analysis**

794 Broad-band autofluorescence was acquired from sections cut at 3  $\mu\text{m}$  using X20 objective  
795 (Leica DM550B). Sections were excited at 458 nm and fluorescence emission captured above  
796 475 nm. Fluorescence intensity per airway epithelium was quantified using ImageJ software  
797 and divided by background emission. At least 10 small airways per mouse was analysed.

798

### 799 **QUANTIFICATION AND STATISTICAL ANALYSIS**

800 GraphPad Prism 7 software was used for statistical analysis. Results were displayed as the  
801 means  $\pm$  SEM and statistical significance was determined with Student's t tests, One-way  
802 analysis of variance (ANOVA) or Two-way ANOVA.

## KEY RESOURCES TABLE

| REAGENT or RESOURCE                                             | SOURCE              | IDENTIFIER    |
|-----------------------------------------------------------------|---------------------|---------------|
| <b>Antibodies</b>                                               |                     |               |
| Anti-Caspase-4                                                  | Santa Cruz          | 4B9           |
| Anti-BrdU                                                       | BD Biosciences      | 555627        |
| Anti-IL-1 $\alpha$                                              | R&D                 | MAB200        |
| Anti-IL-1 $\beta$                                               | R&D                 | MAB201        |
| Anti-IL-6                                                       | R&D                 | AF206NA       |
| Anti-IL-8                                                       | R&D                 | MAB208        |
| Anti-p21                                                        | Sigma               | P1484         |
| Anti-p16 (IF)                                                   | ProteinTech         | 10883-1-AP    |
| Mouse-Alexa Fluor 488                                           | ThermoFisher        | A-11029       |
| Rabbit-Alexa Fluor 594                                          | ThermoFisher        | A-11037       |
| Goat-Alexa Fluor 594                                            | ThermoFisher        | A-11058       |
| Anti-Caspase-1                                                  | Adipogen            | Bally-1       |
| Anti-Gasdermin-D                                                | Novus Biologicals   | NBP2-33422    |
| Anti-p16 (WB)                                                   | Santa Cruz          | JC-8          |
| Anti-p53                                                        | Santa Cruz          | DO-1          |
| Anti-pRb                                                        | BD Pharmigen        | 554136        |
| Anti- $\beta$ -Actin                                            | Santa Cruz          | I-19          |
| Anti-Mouse-HRP                                                  | Sigma               | A2554         |
| Anti-Rabbit-HRP                                                 | Sigma               | A0545         |
| Anti-Goat-HRP                                                   | Sigma               | 2020          |
| Anti-Mouse IgG (Fc specific)-Peroxidase                         | Sigma               | Cat #A2554    |
| Anti-Rabbit IgG (whole molecule)-Peroxidase                     | Sigma               | Cat #A0545    |
| Donkey anti-goat-HRP                                            | Santa Cruz          | Cat #sc-2020  |
| Goat anti-Rabbit IgG Alexa Fluor 594                            | Thermo Fisher       | Cat #A11037   |
| Monoclonal anti-B-Actin-peroxidase (AC-15)                      | Sigma               | Cat #A3854    |
| Mouse monoclonal IgG2B Isotype Controls (20116)                 | R&D systems         | Cat #MAB004   |
| Rabbit polyclonal anti-Caspase 4 + Caspase 11 Biotin conjugated | Bioss               | Cat #bs-6858R |
| <b>Chemicals, Peptides, and Recombinant Proteins</b>            |                     |               |
| 4-hydroxytamoxifen                                              | Sigma               | H7904         |
| Geneticin                                                       | ThermoFisher        | 10131-027     |
| Puromycin                                                       | ThermoFisher        | A11138        |
| Ultrapure lipopolysaccharide (LPS) from E. coli 111:B4          | Invivogen           | tlrl-3pelps   |
| Muramyl dipeptide (MDP)                                         | Tocris              | tlrlmdp       |
| Pam2CSK4                                                        | Tocris              | 4637          |
| Pam3CSK4                                                        | Tocris              | 4633          |
| Recombinant Human Apo-SAA                                       | Peprtech            | #300-13       |
| 5-bromo-2'-deoxyuridine (BrdU)                                  | Sigma               | 858811        |
| X-Gal solution ready to use                                     | ThermoFisher        | R0941         |
| <b>Critical Commercial Assays</b>                               |                     |               |
| Neon Transfection System 100 $\mu$ L Kit                        | Invitrogen          | MPK10025      |
| Q5 site directed mutagenesis kit                                | New England Biolabs | E0554S        |
| Caspase 4 Assay kit (Fluorometric)                              | Abcam               | ab65658       |
| Human IL-1 beta ELISA Ready-Set-Go! Kit                         | ThermoFisher        | 15581087      |
| RNA 6000 Nano Kit                                               | Agilent             | 5067-1511     |
| Ion AmpliSeq Human Gene Expression Core Panel                   | ThermoFisher        | A26325        |

|                                                                                                                                   |                            |                                |
|-----------------------------------------------------------------------------------------------------------------------------------|----------------------------|--------------------------------|
| Ion PI Hi-Q Sequencing 200 Kit                                                                                                    | ThermoFisher               | A26433                         |
| <b>Deposited Data</b>                                                                                                             |                            |                                |
| Ampliseq data                                                                                                                     | GEO                        |                                |
| <b>Experimental Models: Cell Lines</b>                                                                                            |                            |                                |
| HEK293T                                                                                                                           | ATCC                       | N/A                            |
| IMR90 human fetal primary fibroblasts                                                                                             | ATCC                       | N/A                            |
| <b>Experimental Models: Organisms/Strains</b>                                                                                     |                            |                                |
| Mouse: C57BL/6                                                                                                                    | The Jackson Lab.           |                                |
| <b>Oligonucleotides</b>                                                                                                           |                            |                                |
| ON-TARGETplus Non-targeting Pool                                                                                                  | Dharmacon                  | D-001810-10                    |
| ON-TARGETplus CASP1-targeting Pool                                                                                                | Dharmacon                  | LQ-004401-00                   |
| ON-TARGETplus CASP4-targeting Pool                                                                                                | Dharmacon                  | LQ-004404-00                   |
| ON-TARGETplus CASP4-targeting #1                                                                                                  | Dharmacon                  | J-004404-06                    |
| ON-TARGETplus CASP4-targeting #2                                                                                                  | Dharmacon                  | J-004404-08                    |
| ON-TARGETplus GSDMD-targeting Pool                                                                                                | Dharmacon                  | LQ-016207-00                   |
| The sequences and description of primers used for RT-qPCR are provided in Table S1                                                | N/A                        | N/A                            |
| <b>Recombinant DNA</b>                                                                                                            |                            |                                |
| pMSCV-puro-CASP1                                                                                                                  | This paper                 | Exp vector                     |
| pMSCV-puro-CASP4                                                                                                                  | This paper                 | Exp vector                     |
| pMSCV-puro-CASP4-C258A                                                                                                            | This paper                 | Exp vector                     |
| pGIPZ-shCASP1                                                                                                                     | Dharmacon                  | V3LHS_392179                   |
| pGIPZ-shCASP4                                                                                                                     | Dharmacon                  | V3LHS_338745                   |
| pGIPZ-shGSDMD                                                                                                                     | Dharmacon                  | V3LHS_378066                   |
| pGIPZ shTP53                                                                                                                      | Dharmacon                  | V3LHS_333920                   |
| pRS-shCASP4                                                                                                                       | This paper                 | N/A                            |
| pRS-shTP53                                                                                                                        | (Acosta et al., 2008)      | N/A                            |
| <b>Software and Algorithms</b>                                                                                                    |                            |                                |
| MetaXpress High-Content Image Acquisition and Analysis software (used for quantification of immunofluorescence microscopy images) | Molecular Devices          | N/A                            |
| FIJI/ImageJ (used for merging of immunofluorescence microscopy images and SA- $\beta$ -Gal quantification)                        | ImageJ                     | N/A                            |
| Torrent Suite software v.5.2.0                                                                                                    | ThermoFisher               | N/A                            |
| DESeq2 package v.1.20.0                                                                                                           | (Love et al., 2014)        | Bioconductor                   |
| GSEA software v.3.0                                                                                                               | (Subramanian et al., 2005) | UC San Diego / Broad Institute |
| MSigDB v.6.2                                                                                                                      | (Subramanian et al., 2005) | UC San Diego / Broad Institute |
| GraphPad Prism 7                                                                                                                  | GraphPad Software          | Statistics software            |

803 **Supplemental information**

804

805 **Supplemental figure legends**

806 **Figure S1**

807 **LPS-mediated caspase-4 activation induces a senescent phenotype in human primary**  
808 **fibroblasts – related to Figure 1.**

809 (A) IMR90 fibroblasts were un-transfected (UnT), mock-transfected (mock), transfected with MDP (1 µg  
810 / 5 x 10<sup>5</sup> cells) or increasing concentrations of LPS (0.1 or 1 µg LPS / 5 x 10<sup>5</sup> cells). Cell viability was  
811 measured 2 h after transfection.

812 (B) Representative images of IMR90 cells mock-transfected (left) or transfected with 0.1 µg LPS / 5 x  
813 10<sup>5</sup> cells (middle) or 1 µg LPS / 5 x 10<sup>5</sup> cells (right) under brightfield microscopy 24 h after transfection.

814 (C) IMR90 or 293T cells were un-transfected (mock) or transfected with 1 µg LPS / 5 x 10<sup>5</sup> cells (LPS-  
815 T). To confirm that pyroptosis is dependent on intracellular localization of LPS, IMR90 were also treated  
816 with 1 µg LPS / 5 x 10<sup>5</sup> cells without further transfection (LPS - UnT). Cell viability was measured 2.5  
817 h after transfection. Data from a single representative experiment.

818 (D) Cells were treated as shown in Figure 1A. *CASP1* mRNA relative expression was quantified by RT-  
819 qPCR 48 h after LPS transfection.

820 (E) Cells were treated as shown in Figure 1A. Cell viability was measured 24 h after LPS transfection.

821 (F) IMR90 cells were stably infected with an empty pRS vector (vector) or a pRS vector targeting either  
822 *CASP4* (shC4), *GSDMD* (shGSDMD) or *TP53* (shP53) prior to transfection with 0.1 µg LPS / 5 x 10<sup>5</sup>  
823 cells, and cell viability was measured 24 h after LPS transfection.

824 (G) IMR90 fibroblasts were mock-transfected, transfected with 1 µg MDP / 5 x 10<sup>5</sup> cells, or with  
825 increasing concentrations of LPS (0.01, 0.1 or 1 µg LPS / 5 x 10<sup>5</sup> cells). Cell viability was measured  
826 5, 24, 48 and 72 h after transfection.

827 (H) IMR90 fibroblasts were mock-transfected or transfected with increasing concentrations of LPS (0.1  
828 or 1 µg LPS / 5 x 10<sup>5</sup> cells). Cell viability was measured 2.5 h after transfection and viable cells were  
829 replated and cultured for further 48 h before measuring cell viability again. Bars show a single  
830 representative experiment.

831 (I-J) IMR90 fibroblasts were mock-transfected (control), transfected with 1 µg MDP / 5 x 10<sup>5</sup> cells, or  
832 with increasing concentrations of LPS (0.01, 0.1 or 1 µg LPS / 5 x 10<sup>5</sup> cells). BrdU incorporation,

833 p21<sup>CIP1</sup>, p16<sup>INK4a</sup>, p21<sup>CIP1</sup> and caspase-4 levels were measured by IF 48 h after transfection. SA-β-Gal  
834 activity was determined 4 days after transfection. Representative pictures (left) of IF staining for  
835 p16<sup>INK4a</sup>, p21<sup>CIP1</sup> and caspase-4 of mock-transfected (control) and cells transfected with LPS (0.01 LPS  
836 / 5 x 10<sup>5</sup> cells) are shown.

837 Statistical significance in A, D, E and J was calculated using one-way analysis of variance (ANOVA).  
838 Statistical significance in G was calculated using using two-way analysis of variance (ANOVA).  
839 Statistical significance in G was calculated using two-tailed Student's *t*-test. \*\*\*\**P* < 0.0001, \*\*\**P* <  
840 0.001, \*\**P* < 0.01, and \**P* < 0.05. ns, not significant. All error bars represent mean ± s.e.m of 3  
841 independent experiments.

842

## 843 **Figure S2**

844 **LPS-mediated caspase-4 induced senescence is independent on inflammasome priming –**  
845 **related to Figure 2**

846 (A-C) IMR90 were infected with *CASP4*, *CASP1*, *RAS*<sup>G12V</sup> expression vectors or empty vector (vector)  
847 control. (A) Protein amounts of *CASP4* and *CASP1* were analyzed by immunoblotting. (B) BrdU  
848 incorporation and SA-β-Gal activity were determined 4 days after seeding equal number of cells. (C)  
849 Relative cell content (left) was quantified 15 days after equal number of cells were seeded;  
850 representative images (right) of crystal violet stained cells are shown.

851 (D) IMR90 cells were infected with *CASP4* expression vector or empty vector (vector) control and  
852 transfected with LPS (0.1 μg LPS / 5 x 10<sup>5</sup> cells). Caspase-4 and p16<sup>INK4a</sup> protein levels were analyzed  
853 by immunoblotting 48 h after transfection.

854 (E-F) Cells were treated as shown in Figure 1A. p53 (E) and caspase-4 (F) levels were measured by  
855 IF 48 h after LPS transfection.

856 (G) IMR90 cells were treated with MDP (1 μg/mL), LPS, (1 μg/mL) Pam2CSk4 (0.05 μg/mL) and  
857 Pam3CSk4 (0.5 μg/mL). *IL1B* mRNA relative expression was quantified at the indicated points. Data  
858 from a single representative experiment.

859 (H) IMR90 cells infected with TLR2 expressing vector or control empty vector (EV) were primed with 10  
860 μg/ml of A-SAA for 3 hours prior to electroporation with LPS (1 μg/mL) to activate *CASP4*. *IL1B* mRNA  
861 relative expression was quantified 48 hours after LPS transfection.



862 (I) Samples from (H) were analyzed for *IL1A*, *IL6*, *IL8* mRNA relative expression 48 hours after LPS  
863 transfection.

864 (J) SA- $\beta$ -GAL staining was conducted 48 hours after treatment as in (H). Values represent the Mean  $\pm$   
865 SEM of 3 independent experiments.

866 (K) Proliferation capacity in experiment (H) was measured by BrdU incorporation assay.

867 (L) Analysis of *IL1B* mRNA expression by qRT-PCR in IMR90 cells infected with TLR2 expressing  
868 vector or control empty vector (EV), primed with 1  $\mu$ g/ml Pam2CSK4 for 3 hours, followed by  
869 electroporation with 1  $\mu$ g/mL LPS for 48 hours.

870 Statistical significance was calculated using one-way analysis of variance (ANOVA). \*\*\*\* $P < 0.0001$ ,  
871 \*\*\* $P < 0.001$ , \*\* $P < 0.01$ , and \* $P < 0.05$ . ns, not significant. All error bars represent mean  $\pm$  s.e.m of 3  
872 independent experiments.

873

874

### 875 **Figure S3**

#### 876 **Caspase-4 mediated regulation of senescence is independent of its catalytical function – related** 877 **to Figure 3**

878 (A) Related to Figure 3D. Cells in culture under brightfield microscopy 24 h after transfection, at the  
879 time of viability assessment.

880 (B) Related to Figure 3F. Representative images of SA- $\beta$ -Gal stained cells 4 days after transfection.

881

### 882 **Figure S4**

#### 883 **The caspase-4 non-canonical inflammasome is activated in Oncogene-induced senescence –** 884 **related to Figure 4**

885 (A) *CDKN1A* (p21<sup>CIP1</sup>), *CDKN2A* (p16<sup>INK4a</sup>) and *CDKN2B* (p15<sup>INK4b</sup>) relative expression levels were  
886 measured in IMR90 cells undergoing *RAS*<sup>G12V</sup>-OIS and control cells.

887 (B) Representative images of caspase-4 stained cells by IF of IMR90 ER:STOP and ER:RAS cells  
888 treated with the indicated siRNA 5 days after the addition of 4OHT.

889 (C) After 8 days of 4OHT treatment, conditioned media (CM) from IMR90 ER:STOP and ER:RAS cells  
890 was collected and added to IMR90. After 48 h, BrdU incorporation (middle) and caspase-4 levels (right)  
891 were measured by IF.

892 (D) IMR90 cells were treated with 10  $\mu$ M etoposide and 48 hour later BrdU incorporation (left) and  
893 caspase-4 (right) levels were measured by IF. Data relative to BrdU incorporation belongs to a single  
894 representative experiment.

895 (E) IMR90 ER:STOP and ER:RAS cells were treated with 4OHT for the indicated time, cells were  
896 harvested and subjected to DSS-crosslinking. After SDS-PAGE separation, both DSS-crosslinked  
897 samples and inputs were probed for caspase-4 following western blot procedures.

898 Statistical significance was calculated using two-tailed Student's *t*-test. \*\*\*\**P* < 0.0001, \*\*\**P* < 0.001,  
899 \*\**P* < 0.01, and \**P* < 0.05. ns, not significant. All error bars represent mean  $\pm$  s.e.m of 3 independent  
900 experiments.

901

902

### 903 **Figure S5**

#### 904 **Caspase-4 activation controls the proinflammatory SASP – related to Figure 5**

905 (A) *CASP4* mRNA relative expression levels were quantified by RT-qPCR after 5 days (left) and 8 days  
906 (right) of 4OHT treatment in ER:STOP and ER:RAS cells transfected with the indicated siRNA.

907 (B) Top five differentially expressed genes upon *CASP4*-targeting in *RAS*<sup>G12V</sup>-OIS identified by DEG  
908 analysis 5 and 8 days after 4OHT treatment.

909 (C) Principal component analysis (PCA) of variance stabilized transformed data using a parametric fit  
910 for the dispersion. Each dot corresponds to a sample replicate.

911 (D) Heatmap and hierarchical clustering of the 30 genes with highest variance across all samples based  
912 on the total transformed data.

913 (E) Related to Figure 5B. Enrichment plots of the signature “INFLAMMATORY RESPONSE” upon  
914 *CASP4*-targeting in *RAS*<sup>G12V</sup>-OIS 5 (top) and 8 (bottom) days after 4OHT treatment are shown.

915 (F) IMR90 ER:STOP or ER:RAS cells were transfected with control (NTP), *CASP1* or *CASP4*-targeting  
916 siRNA and treated with 4OHT during 8 days. IL-1 $\alpha$ , L-1 $\beta$ , IL-6 and IL-8 levels were analyzed by IF 8  
917 days after the addition of 4OHT. Representative images as used for the high content analysis are also  
918 shown.

919 (G) After 8 days of 4OHT treatment, conditioned media (CM) from IMR90 ER:STOP and ER:RAS cells  
920 was collected and added to IMR90. Concomitantly, IMR90 cells were transfected with control (NTP),

921 *CASP1* or *CASP4*-targeting siRNA. After 48 h, *IL1A*, *IL1B*, *IL8*, *IL6*, *CASP1* and *CASP4* mRNA relative  
922 expression levels were measured by RT-qPCR.

923 Statistical significance in A and F was calculated using one-way analysis of variance (ANOVA).

924 Statistical significance in G was calculated using two-tailed Student's *t*-test. \*\*\*\**P* < 0.0001, \*\*\**P* <  
925 0.001, \*\**P* < 0.01, \**P* < 0.05 and ns, not significant. All error bars represent mean ± s.e.m of 3  
926 independent experiments.

927

928

## 929 **Figure S6**

### 930 **Caspase-4 contributes to the cell cycle arrest program in OIS – related to Figure 6**

931 (A) *GSDMD* mRNA relative expression was quantified by RT-qPCR in IMR90 ER:STOP and ER:RAS  
932 cells 0, 2, 4, 6 and 8 days after 4OHT addition.

933 (B) IMR90 ER:STOP/ER:RAS cells were treated with 4OHT for the indicated time. Caspase-4, full-  
934 length (FL) and N-terminal (NT) Gasdermin-D, p21<sup>CIP1</sup>, p16<sup>INK4a</sup>, IL-1β and IL-8 levels were analyzed by  
935 immunoblotting.

936 (C) IMR90 ER:STOP/ER:RAS cells were transfected with control, *CASP1*, *CASP4* or *GSDMD*-targeting  
937 siRNAs. To analyze knockdown efficiency, *CASP1*, *CASP4* and *GSDMD* mRNA relative expression  
938 levels were quantified by RT-qPCR after 5 days of 4OHT treatment.

939 (D) IMR90 ER:STOP and ER:RAS cells were transfected with control, *CASP1*, *CASP4* or *GSDMD*-  
940 targeting siRNAs. *IL1A*, *IL1B* and *IL8* mRNA relative expression levels were quantified by RT-qPCR  
941 after 5 days of 4OHT treatment.

942 (E) IMR90 ER:STOP and ER:RAS cells were transfected with the indicated siRNAs and secreted IL-1β  
943 was quantified by ELISA 6,7, and 8 days after 4OHT addition. Statistical analysis was performed  
944 comparing control senescent cells (ER:RAS siNTP) to the other conditions 8 days after 4OHT addition.

945 (F) IMR90 ER:STOP and ER:RAS cells were transfected with control (NTP), two individual *CASP4*-  
946 targeting siRNAs or a pool of 4 different siRNA sequences targeting *CASP4*, and treated with 4OHT or  
947 not as indicated. Caspase-4 levels were measured by IF 5 days after 4OHT addition.

948 (G) IMR90 ER:STOP and ER:RAS cells were transfected with control, or *CASP4*-targeting siRNAs and  
949 SA-β-Gal activity was determined 8 days after the addition of 4OHT (left). Representative images for  
950 SA-β-Gal activity are shown (right).

951 (H) Enrichment plots of the signatures “G2M CHECKPOINT” (left) and “E2F TARGETS” (right) upon  
952 *CASP4*-targeting in *RAS*<sup>G12V</sup>-OIS IMR90 cells 5 days after 4OHT treatment.

953 (I) IMR90 ER:STOP and ER:RAS cells were transfected with control (NTP), *CASP1* or *CASP4*- targeting  
954 siRNAs. After 5 days of 4OHT treatment, caspase-4 proIL-1 $\beta$  and pRb were analyzed by  
955 immunoblotting.

956 (J) Catalytically inactive (C258A) *CASP4* was overexpressed in IMR90 cells prior to LPS transfection  
957 (1  $\mu$ g LPS/5 x 10<sup>5</sup> cells). 48 h after transfection, caspase-4 and pRb were analyzed by immunoblotting.

958 (K) IMR90 cells were infected with an empty pRS vector (vector) or a pRS vector targeting either *CASP1*  
959 or *CASP4* prior to transfection with 0.1  $\mu$ g LPS / 5 x 10<sup>5</sup> cells. *CCNA1*, *CDC6* and *BUB1* mRNA relative  
960 expression were quantified by RT-qPCR 48 h after LPS transfection.

961 (L) IMR90 ER:STOP and ER:RAS cells were transfected with control, *CASP1*, *CASP4* or *GSDMD*-  
962 targeting siRNAs. BrdU incorporation was measured by IF 5 days after 4OHT addition.

963 Statistical significance in A, G and L was calculated using two-tailed Student's *t*-test. Statistical  
964 significance in C-F and K was calculated using one-way analysis of variance (ANOVA). \*\*\*\**P* < 0.0001,  
965 \*\*\**P* < 0.001, \*\**P* < 0.01, and \**P* < 0.05. ns, not significant. All error bars represent mean  $\pm$  s.e.m of 3  
966 independent experiments.

967

968 **Table S1: Primers used for mRNA gene expression analysis**

| Gene   | Forward                  | Reverse                   |
|--------|--------------------------|---------------------------|
| ACTB   | CATGTACGTTGCTATCCAGGC    | CTCCTTAATGTCACGCACGAT     |
| CASP4  | GAGAAGCAACGTATGGCAGG     | GGAATTCTTCATGAGGACAAAGC   |
| IL1B   | TGCACGCTCCGGGACTCACA     | CATGGAGAACACCACTTGTGTCTCC |
| IL1A   | AGTGCTGCTGAAGGAGATGCCTGA | CCCCTGCCAAGCACACCCAGTA    |
| IL6    | CCAGGAGCCCAGCTATGAAC     | CCCAGGGAGAAGGCAACTG       |
| IL8    | GAGTGGACCACACTGCGCCA     | TCCACAACCCTCTGCACCCAGT    |
| CASP1  | CAACTACAGAAGAGTTTGAGG    | AACATTATCTGGTGTGGAAG      |
| GSDMD  | ATGGATGGGCAGATACAGGG     | TGCTGCAGGACTTTGTGTTC      |
| CDKN1A | CCTGTCACTGTCTTGTACCCT    | GCGTTTGGAGTGGTAGAAATCT    |
| CDKN2A | CGGTCGGAGGCCGATCCAG      | GCGCCGTGGAGCAGCAGCAGCT    |
| CDKN2B | GAATGCGCGAGGAGAACAAG     | CCATCATCATGACCTGGATCG     |
| BUB1   | ACACCATTCCACAAGCTT       | CGCCTGGGTACTACTGTTT       |
| CDC6   | GTTCAATTCTGTGCCCGCAA     | TAGCTCTCCTGCAAACATCCAG    |

|       |                       |                       |
|-------|-----------------------|-----------------------|
| CCNA1 | CCATCGACCTCAGCAAGCA   | TGGCTCCATGAGGGACACA   |
| CCNA2 | AGGAAACTTCAGCTTGTGGG  | CACAACTCTGCTACTTCTGGG |
| CCNB1 | TGTGTCAGGCTTTCTCTGATG | TTGGTCTGACTGCTTGCTCT  |
| MCM6  | ACTGTTCTGGACTTCTTGG   | ACGAATCAGTTCCTCTGCT   |
| SAA1  | GAGCACACCAAGGAGTGATTT | GAAGCTTCATGGTGCTCTCT  |
| SAA2  | GCTGCAGAAGTGATCAGCAAT | CAGCGAGTCCTCCGCAC     |

## Figure S1

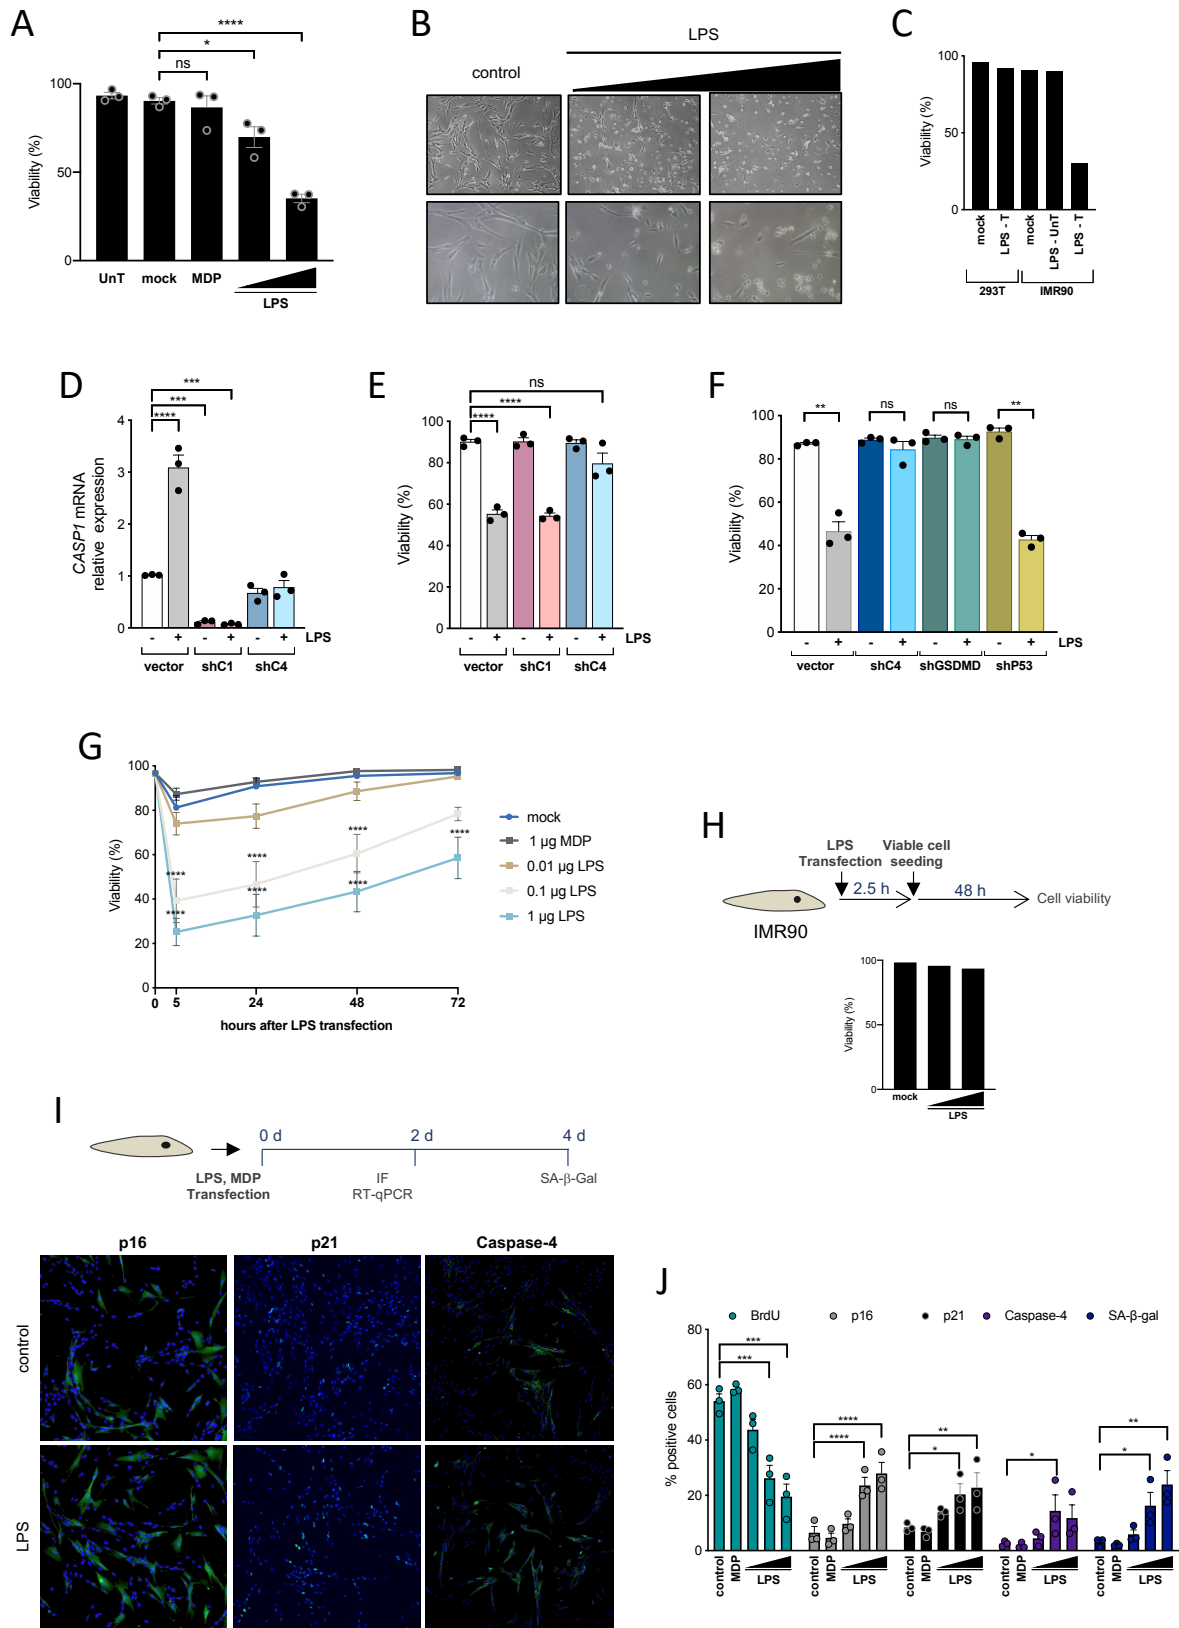

## Figure S2

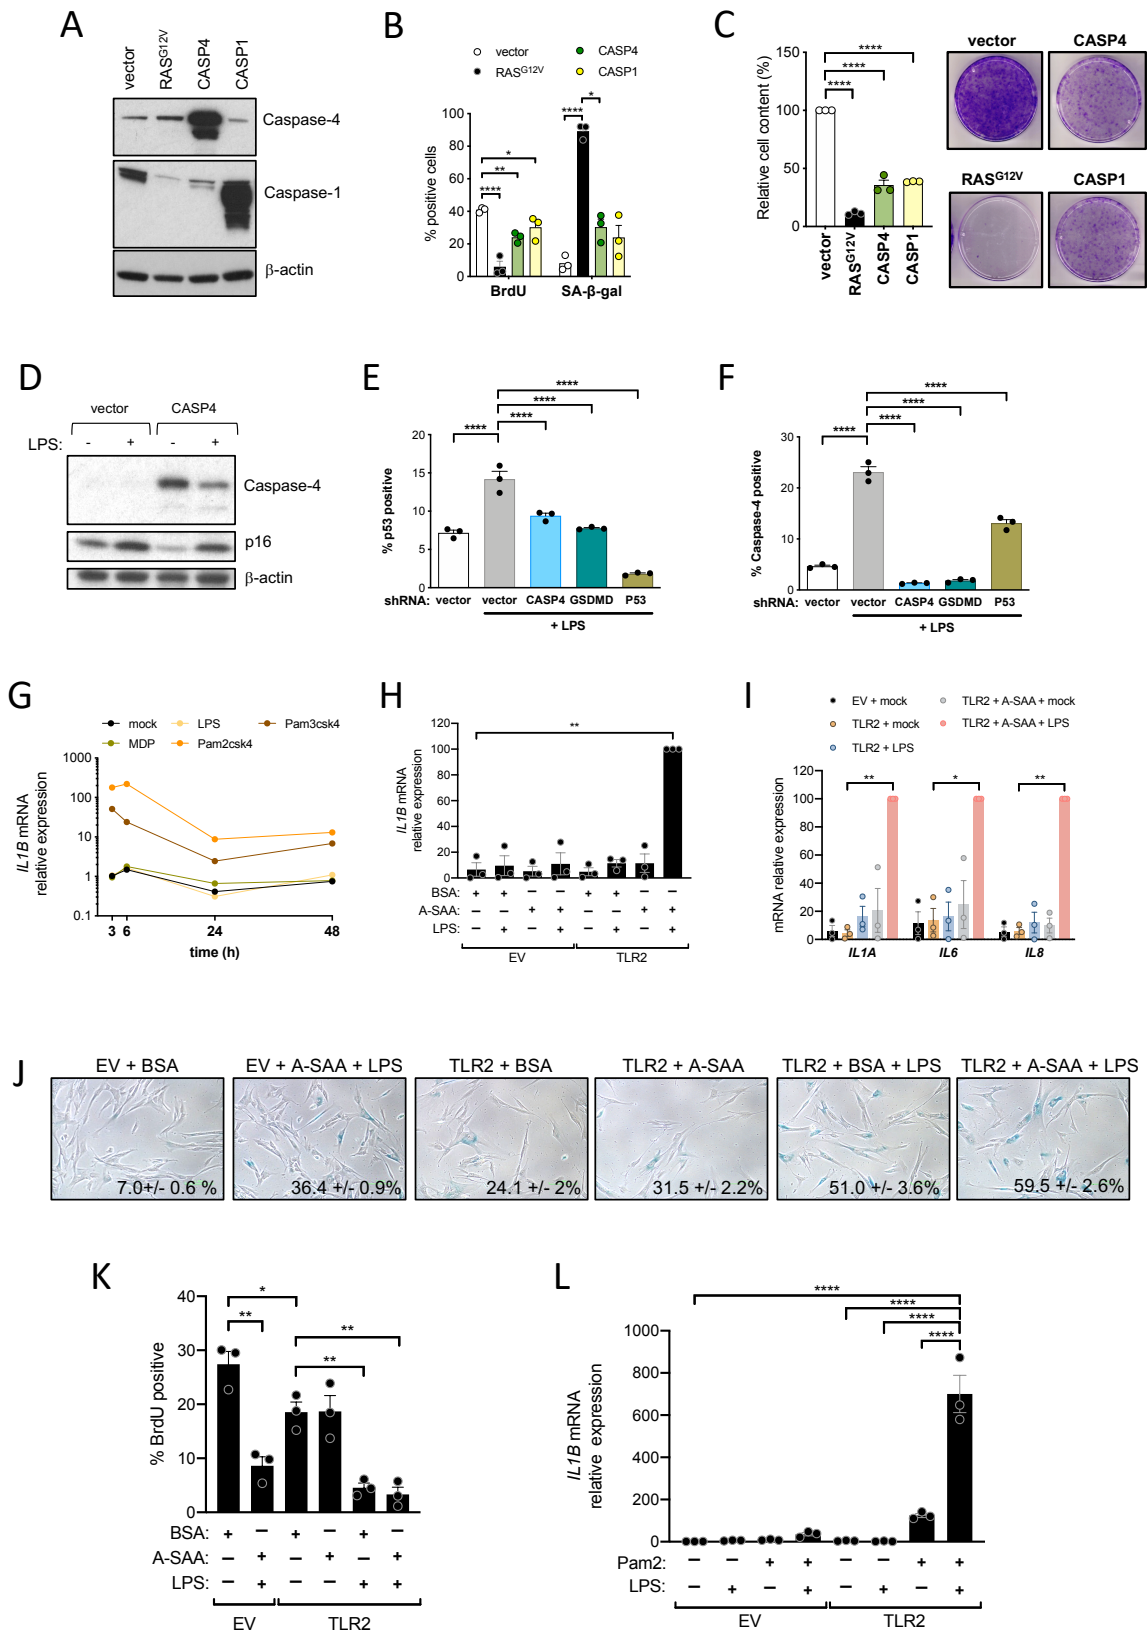

## Figure S3

A

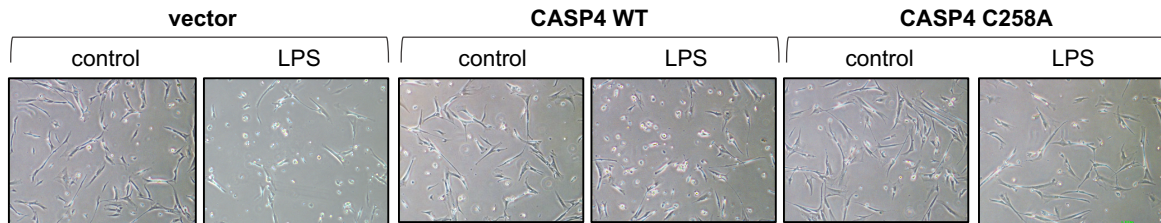

B

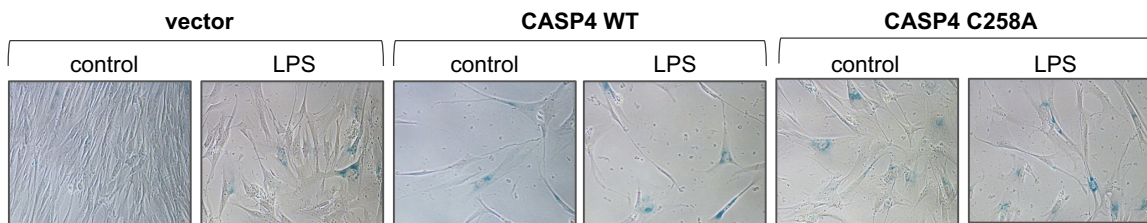



## Figure S4

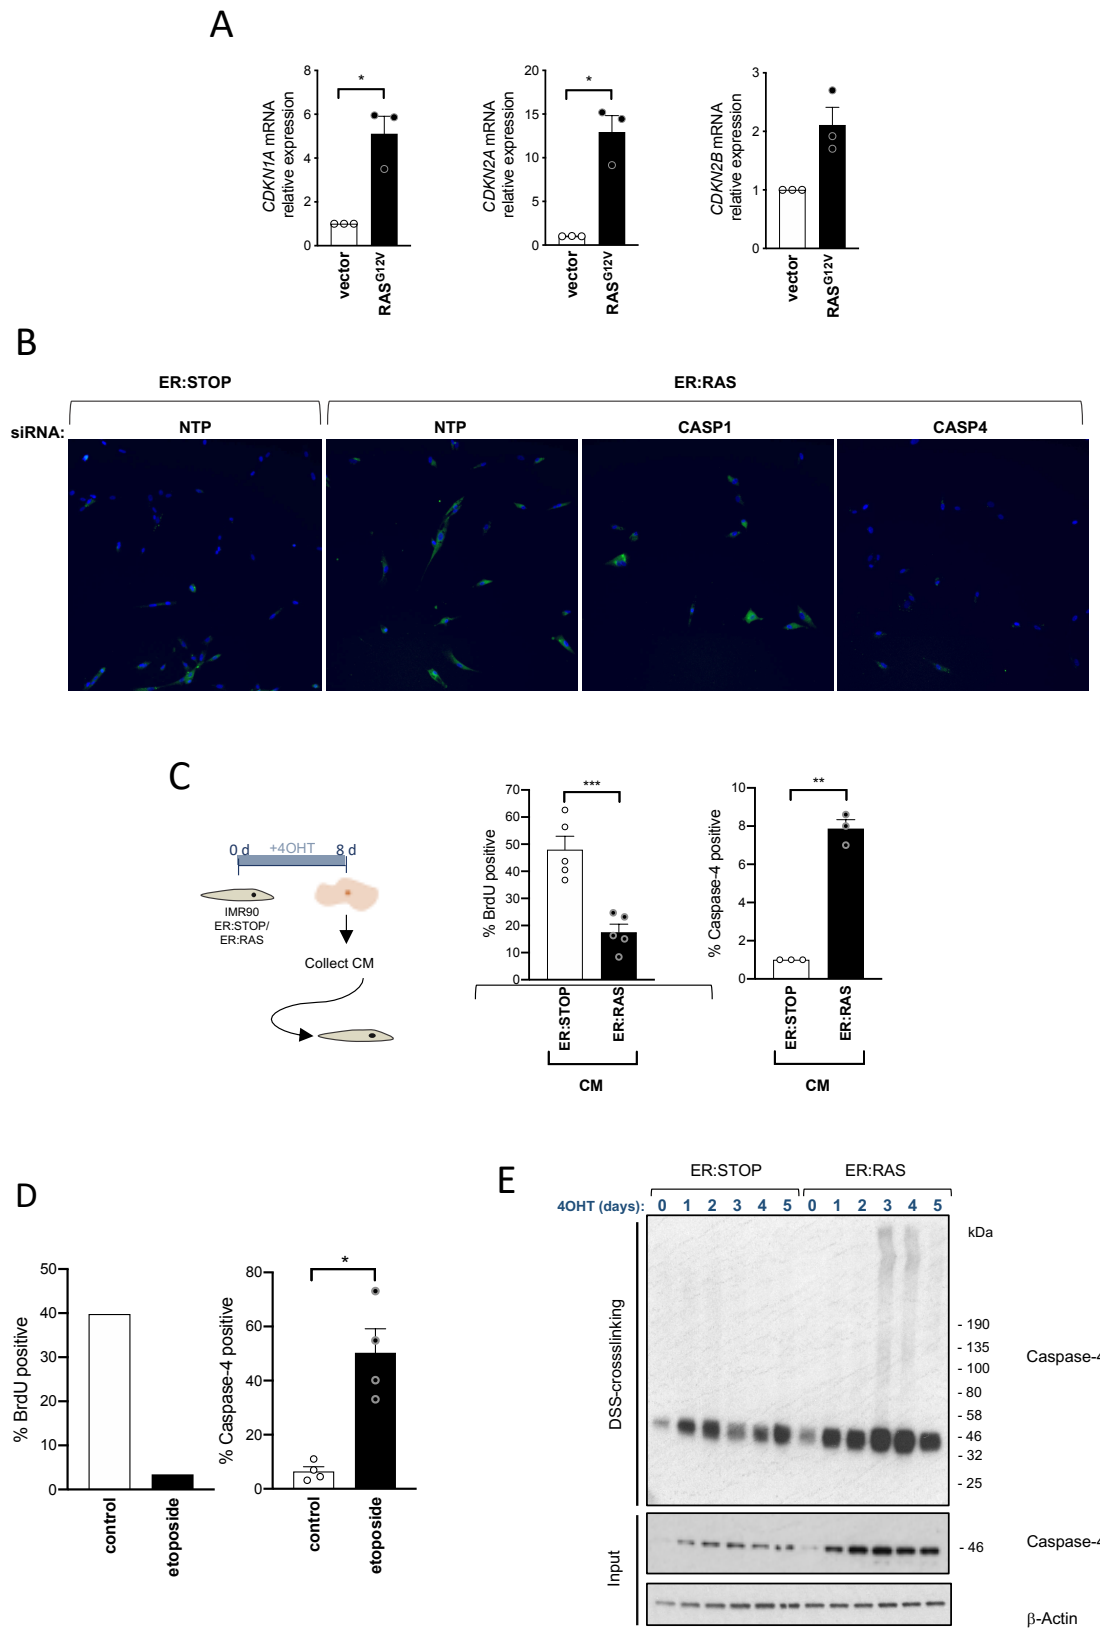

## Figure S5

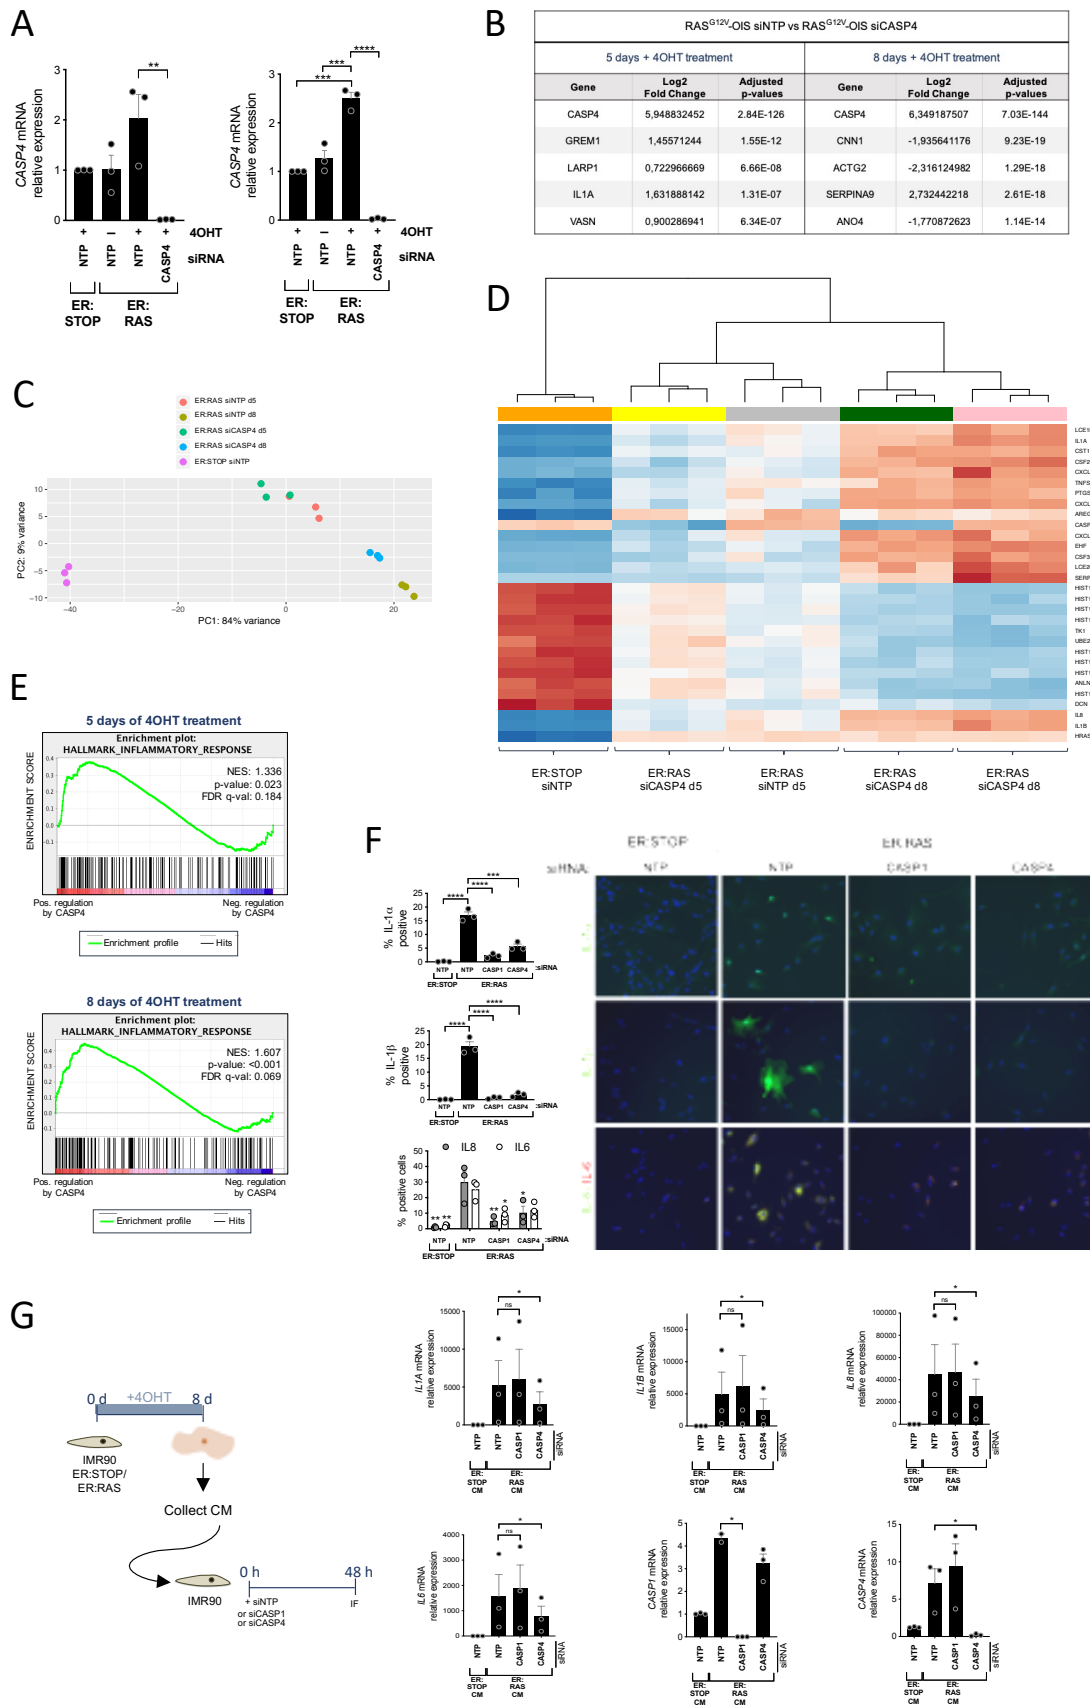

## Figure S6

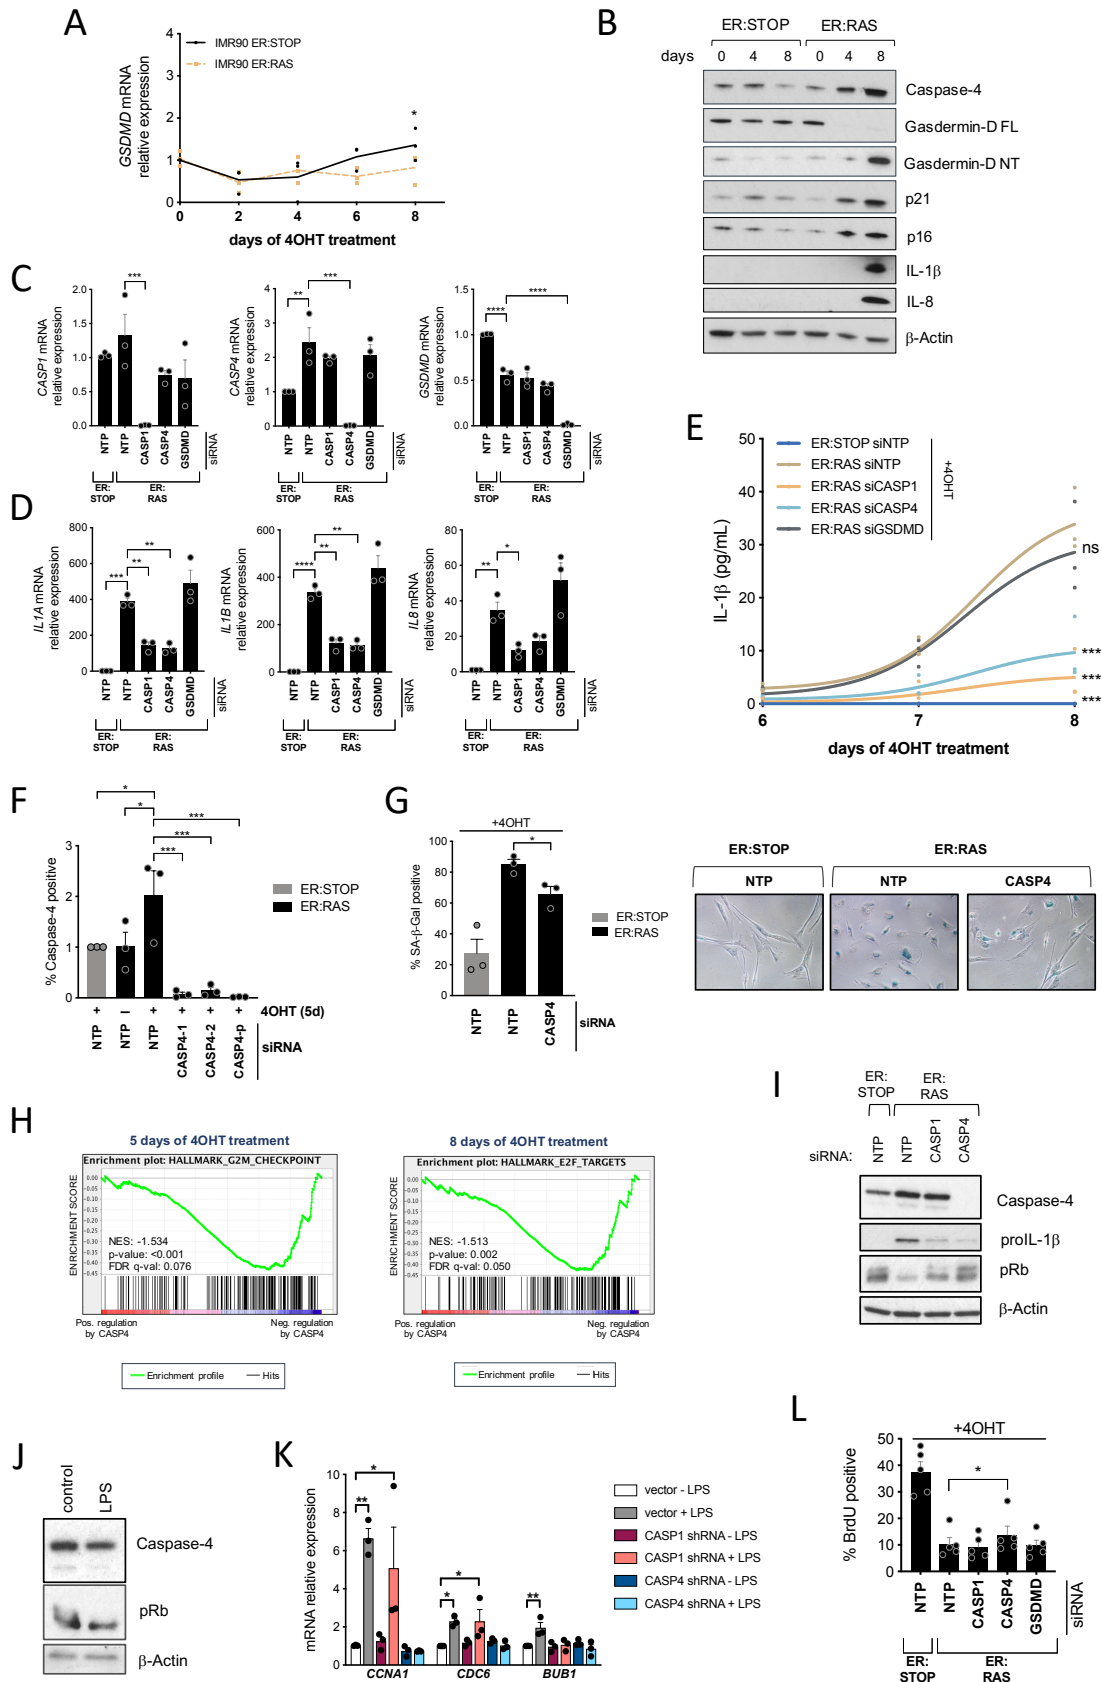

## References

- Acosta, J.C., Banito, A., Wuestefeld, T., Georgilis, A., Janich, P., Morton, J.P., Athineos, D., Kang, T.W., Lasitschka, F., Andrulis, M., *et al.* (2013). A complex secretory program orchestrated by the inflammasome controls paracrine senescence. *Nat Cell Biol* 15, 978-990.
- Acosta, J.C., O'Loughlen, A., Banito, A., Guijarro, M.V., Augert, A., Raguz, S., Fumagalli, M., Da Costa, M., Brown, C., Popov, N., *et al.* (2008). Chemokine signaling via the CXCR2 receptor reinforces senescence. *Cell* 133, 1006-1018.
- Afonina, I.S., Muller, C., Martin, S.J., and Beyaert, R. (2015). Proteolytic Processing of Interleukin-1 Family Cytokines: Variations on a Common Theme. *Immunity* 42, 991-1004.
- Baar, M.P., Brandt, R.M., Putavet, D.A., Klein, J.D., Derks, K.W., Bourgeois, B.R., Stryeck, S., Rijksen, Y., van Willigenburg, H., Feijtel, D.A., *et al.* (2017). Targeted Apoptosis of Senescent Cells Restores Tissue Homeostasis in Response to Chemotoxicity and Aging. *Cell* 169, 132-147 e116.
- Baker, D.J., Childs, B.G., Durik, M., Wijers, M.E., Sieben, C.J., Zhong, J., Saltness, R.A., Jeganathan, K.B., Verzosa, G.C., Pezeshki, A., *et al.* (2016). Naturally occurring p16(Ink4a)-positive cells shorten healthy lifespan. *Nature* 530, 184-189.
- Baker, D.J., Wijshake, T., Tchkonja, T., LeBrasseur, N.K., Childs, B.G., van de Sluis, B., Kirkland, J.L., and van Deursen, J.M. (2011). Clearance of p16Ink4a-positive senescent cells delays ageing-associated disorders. *Nature* 479, 232-236.
- Boumendil, C., Hari, P., Olsen, K.C.F., Acosta, J.C., and Bickmore, W.A. (2019). Nuclear pore density controls heterochromatin reorganization during senescence. *Genes Dev* 33, 144-149.
- Chang, J., Wang, Y., Shao, L., Laberge, R.M., Demaria, M., Campisi, J., Janakiraman, K., Sharpless, N.E., Ding, S., Feng, W., *et al.* (2016). Clearance of senescent cells by ABT263 rejuvenates aged hematopoietic stem cells in mice. *Nat Med* 22, 78-83.
- Choi, Y.J., Kim, S., Choi, Y., Nielsen, T.B., Yan, J., Lu, A., Ruan, J., Lee, H.R., Wu, H., Spellberg, B., *et al.* (2019). SERPINB1-mediated checkpoint of inflammatory caspase activation. *Nat Immunol* 20, 276-287.
- Coppe, J.P., Patil, C.K., Rodier, F., Sun, Y., Munoz, D.P., Goldstein, J., Nelson, P.S., Desprez, P.Y., and Campisi, J. (2008). Senescence-associated secretory phenotypes reveal cell-nonautonomous functions of oncogenic RAS and the p53 tumor suppressor. *PLoS Biol* 6, 2853-2868.
- Dorr, J.R., Yu, Y., Milanovic, M., Beuster, G., Zasada, C., Dabritz, J.H., Lisec, J., Lenze, D., Gerhardt, A., Schleicher, K., *et al.* (2013). Synthetic lethal metabolic targeting of cellular senescence in cancer therapy. *Nature* 501, 421-425.
- Dou, Z., Ghosh, K., Vizioli, M.G., Zhu, J., Sen, P., Wangensteen, K.J., Simithy, J., Lan, Y., Lin, Y., Zhou, Z., *et al.* (2017). Cytoplasmic chromatin triggers inflammation in senescence and cancer. *Nature* 550, 402-406.

Faget, D.V., Ren, Q., and Stewart, S.A. (2019). Unmasking senescence: context-dependent effects of SASP in cancer. *Nat Rev Cancer*.

Faucheu, C., Diu, A., Chan, A.W., Blanchet, A.M., Miossec, C., Herve, F., Collard-Dutilleul, V., Gu, Y., Aldape, R.A., Lippke, J.A., *et al.* (1995). A novel human protease similar to the interleukin-1 beta converting enzyme induces apoptosis in transfected cells. *EMBO J* 14, 1914-1922.

Fernandez-Duran, I., Tarrats, N., Hari, P., and Acosta, J.C. (2019). Measuring the Inflammasome in Oncogene-Induced Senescence. *Methods Mol Biol* 1896, 57-70.

Gluck, S., Guey, B., Gulen, M.F., Wolter, K., Kang, T.W., Schmacke, N.A., Bridgeman, A., Rehwinkel, J., Zender, L., and Ablasser, A. (2017). Innate immune sensing of cytosolic chromatin fragments through cGAS promotes senescence. *Nat Cell Biol* 19, 1061-1070.

Gorgoulis, V., Adams, P.D., Alimonti, A., Bennett, D.C., Bischof, O., Bishop, C., Campisi, J., Collado, M., Evangelou, K., Ferbeyre, G., *et al.* (2019). Cellular Senescence: Defining a Path Forward. *Cell* 179, 813-827.

Hari, P., Millar, F.R., Tarrats, N., Birch, J., Quintanilla, A., Rink, C.J., Fernandez-Duran, I., Muir, M., Finch, A.J., Brunton, V.G., *et al.* (2019). The innate immune sensor Toll-like receptor 2 controls the senescence-associated secretory phenotype. *Sci Adv* 5, eaaw0254.

He, W.T., Wan, H., Hu, L., Chen, P., Wang, X., Huang, Z., Yang, Z.H., Zhong, C.Q., and Han, J. (2015). Gasdermin D is an executor of pyroptosis and required for interleukin-1beta secretion. *Cell Res* 25, 1285-1298.

Herranz, N., and Gil, J. (2018). Mechanisms and functions of cellular senescence. *J Clin Invest* 128, 1238-1246.

Hoare, M., Ito, Y., Kang, T.W., Weekes, M.P., Matheson, N.J., Patten, D.A., Shetty, S., Parry, A.J., Menon, S., Salama, R., *et al.* (2016). NOTCH1 mediates a switch between two distinct secretomes during senescence. *Nat Cell Biol* 18, 979-992.

Jurk, D., Wilson, C., Passos, J.F., Oakley, F., Correia-Melo, C., Greaves, L., Saretzki, G., Fox, C., Lawless, C., Anderson, R., *et al.* (2014). Chronic inflammation induces telomere dysfunction and accelerates ageing in mice. *Nat Commun* 2, 4172.

Karki, R., and Kanneganti, T.D. (2019). Diverging inflammasome signals in tumorigenesis and potential targeting. *Nat Rev Cancer* 19, 197-214.

Kastenhuber, E.R., and Lowe, S.W. (2017). Putting p53 in Context. *Cell* 170, 1062-1078.

Kayagaki, N., Stowe, I.B., Lee, B.L., O'Rourke, K., Anderson, K., Warming, S., Cuellar, T., Haley, B., Roose-Girma, M., Phung, Q.T., *et al.* (2015). Caspase-11 cleaves gasdermin D for non-canonical inflammasome signalling. *Nature* 526, 666-671.

Kuilman, T., Michaloglou, C., Vredeveld, L.C., Douma, S., van Doorn, R., Desmet, C.J., Aarden, L.A., Mooi, W.J., and Peeper, D.S. (2008). Oncogene-induced senescence relayed by an interleukin-dependent inflammatory network. *Cell* 133, 1019-1031.

Lamkanfi, M., and Dixit, V.M. (2014). Mechanisms and functions of inflammasomes. *Cell* 157, 1013-1022.

Love, M.I., Huber, W., and Anders, S. (2014). Moderated estimation of fold change and dispersion for RNA-seq data with DESeq2. *Genome Biol* 15, 550.

Man, S.M., and Kanneganti, T.D. (2016). Converging roles of caspases in inflammasome activation, cell death and innate immunity. *Nat Rev Immunol* 16, 7-21.

Martinez-Zamudio, R.I., Roux, P.F., de Freitas, J., Robinson, L., Dore, G., Sun, B., Belenki, D., Milanovic, M., Herbig, U., Schmitt, C.A., *et al.* (2020). AP-1 imprints a reversible transcriptional programme of senescent cells. *Nat Cell Biol* 22, 842-855.

McHugh, D., and Gil, J. (2018). Senescence and aging: Causes, consequences, and therapeutic avenues. *J Cell Biol* 217, 65-77.

Morton, J.P., Timpson, P., Karim, S.A., Ridgway, R.A., Athineos, D., Doyle, B., Jamieson, N.B., Oien, K.A., Lowy, A.M., Brunton, V.G., *et al.* (2010). Mutant p53 drives metastasis and overcomes growth arrest/senescence in pancreatic cancer. *Proc Natl Acad Sci U S A* 107, 246-251.

Orjalo, A.V., Bhaumik, D., Gengler, B.K., Scott, G.K., and Campisi, J. (2009). Cell surface-bound IL-1alpha is an upstream regulator of the senescence-associated IL-6/IL-8 cytokine network. *Proc Natl Acad Sci U S A* 106, 17031-17036.

Paez-Ribes, M., Gonzalez-Gualda, E., Doherty, G.J., and Munoz-Espin, D. (2019). Targeting senescent cells in translational medicine. *EMBO Mol Med* 11, e10234.

Pantazi, A., Quintanilla, A., Hari, P., Tarrats, N., Parasyraki, E., Dix, F.L., Patel, J., Chandra, T., Acosta, J.C., and Finch, A.J. (2019). Inhibition of the 60S ribosome biogenesis GTPase LSG1 causes endoplasmic reticular disruption and cellular senescence. *Aging Cell* 18, e12981.

Shi, J., Zhao, Y., Wang, K., Shi, X., Wang, Y., Huang, H., Zhuang, Y., Cai, T., Wang, F., and Shao, F. (2015). Cleavage of GSDMD by inflammatory caspases determines pyroptotic cell death. *Nature* 526, 660-665.

Shi, J., Zhao, Y., Wang, Y., Gao, W., Ding, J., Li, P., Hu, L., and Shao, F. (2014). Inflammatory caspases are innate immune receptors for intracellular LPS. *Nature* 514, 187-192.

Sollberger, G., Strittmatter, G.E., Kistowska, M., French, L.E., and Beer, H.D. (2012). Caspase-4 is required for activation of inflammasomes. *J Immunol* 188, 1992-2000.

Soto-Gamez, A., and Demaria, M. (2017). Therapeutic interventions for aging: the case of cellular senescence. *Drug Discov Today* 22, 786-795.

Subramanian, A., Tamayo, P., Mootha, V.K., Mukherjee, S., Ebert, B.L., Gillette, M.A., Paulovich, A., Pomeroy, S.L., Golub, T.R., Lander, E.S., *et al.* (2005). Gene set enrichment analysis: a knowledge-based approach for interpreting genome-wide expression profiles. *Proc Natl Acad Sci U S A* 102, 15545-15550.

Caspase-4 promotes senescence

Fernández-Duran et al.

Takeuchi, O., and Akira, S. (2010). Pattern recognition receptors and inflammation. *Cell* *140*, 805-820.
